1 **MK2a inhibitor CMPD1 abrogates chikungunya virus infection by modulating actin**  
2 **remodeling pathway.**

3 Prabhudutta Mamidi<sup>1</sup>, Tapas Kumar Nayak<sup>3,2</sup>, Abhishek Kumar<sup>4,1</sup>, Sameer Kumar<sup>5,1</sup>, Sanchari  
4 Chatterjee<sup>1,6</sup>, Saikat De<sup>1</sup>, Ankita Datey<sup>1</sup>, Eshna Laha<sup>1</sup>, Amrita Ray<sup>1</sup>, Subhasis Chattopadhyay<sup>2\*</sup>,  
5 Soma Chattopadhyay<sup>1\*</sup>

6 Running title: CMPD1 inhibits chikungunya virus infection.

7 <sup>1</sup>Institute of Life Sciences, Bhubaneswar, India

8 <sup>2</sup>National Institute of Science Education and Research, Jatni, India.

9 <sup>3</sup>Center for Translational Medicine, Lewis Katz School of Medicine,  
10 Temple University, Philadelphia, PA 19140, United States of America

11 <sup>4</sup>Department of Oral Biology, University of Florida College of Dentistry, Gainesville, Florida,  
12 United States of America

13 <sup>5</sup>Department of Microbiology and Immunology, Carver College of Medicine, University of Iowa,  
14 Iowa city, United States of America.

15 <sup>6</sup>Regional Centre for Biotechnology, Faridabad

16 **\* Address of Corresponding author:**

17 Soma Chattopadhyay

18 Institute of Life Sciences,

19 Autonomous Institute of Dept of Biotechnology (Govt of India),

20 Nalco Square, Bhubaneswar-751023, India

21 Phone No: 0091 674 2304235; Fax No: 0091 674 2300728

22 Email: sochat.ils@gmail.com

23

24 Subhasis Chattopadhyay

25 School of Biological Sciences,

26 National Institute of Science Education & Research,

27 Bhubaneswar, HBNI, Jatni, Khurda,

28 Odisha, 752050, India.

29 Email: subho@niser.ac.in.

30

31

32

33

34 Key Words: Chikungunya, Alphavirus, MK2, MK3, CMPD1

35

36

37

38

39

40

41

42

43

## 44 **Abstract**

45 Chikungunya virus (CHIKV) epidemics around the world have created public health concern  
46 with the unavailability of effective drugs and vaccines. This emphasizes the need for molecular  
47 understanding of host-virus interactions for developing effective targeted antivirals. Microarray  
48 analysis was carried out using CHIKV strain (Prototype and Indian) infected Vero cells and two  
49 host isozymes, MK2 and MK3 were selected for further analysis. Gene silencing and drug  
50 treatment were performed *in vitro* and *in vivo* to unravel the role of MK2/MK3 in CHIKV  
51 infection. Gene silencing of MK2 and MK3 abrogated around 58% CHIKV progeny release from  
52 the host cell and a MK2 activation (a) inhibitor (CMPD1) treatment demonstrated 68% inhibition  
53 of viral infection suggesting a major role of MAPKAPKs during the late phase of CHIKV  
54 infection *in vitro*. Further, it was observed that the inhibition in viral infection is primarily due to  
55 the abrogation of lamellipodium formation through modulation of factors involved in the actin  
56 cytoskeleton remodeling pathway that is responsible for releasing the virus from the infected  
57 cells. Moreover, CHIKV-infected C57BL/6 mice demonstrated reduction in the viral copy  
58 number, lessened disease score and better survivability after CMPD1 treatment. In addition,  
59 reduction in expression of key pro-inflammatory mediators such as CXCL13, RAGE, FGF,  
60 MMP9 and increase in HGF (a CHIKV infection recovery marker) was observed indicating the  
61 effectiveness of this drug against CHIKV. Additionally, CMPD1 also inhibited HSV1 and SARS  
62 CoV2-19 infection *in vitro*. Taken together it can be proposed that MK2 and MK3 are crucial  
63 host factors for CHIKV infection and can be considered as key targets for developing effective  
64 anti-CHIKV strategies in future.

65

66

## 67 **Author summary**

68 Chikungunya virus has been a dreaded disease from the first time it occurred in 1952 Tanzania.  
69 Since then it has been affecting the different parts of the world at different time periods in large  
70 scale. It is typically transmitted to humans by bites of *Aedes aegypti* and *Aedes albopictus*  
71 mosquitoes. Although, studies have been undertaken to combat the disease still there are no  
72 effective strategies like vaccines or antivirals against it. Therefore it is essential to understand the  
73 virus and host interaction to overcome this hurdle. In this study two host factors MK2 and MK3  
74 have been taken into consideration to see how they regulate the multiplication of the virus. The  
75 *in vitro* experiments demonstrated that inhibition of MK2 and MK3 restricted viral infection  
76 Further, it was observed that this is due to the blocking of lamellipodium formation by modifying  
77 the factors involved in the actin cytoskeleton remodeling pathway that is responsible for  
78 releasing the virus from the infected cells. Besides, decreased disease score as well as better  
79 survivability was noticed in the *in vivo* experiments with mice. Therefore, MK2 and MK3 could  
80 be considered as the key targets for controlling CHIKV infection.

81

82

83

84

85

86

87

88

89

## 90 **Introduction**

91 The Chikungunya virus (CHIKV) is an insect-borne virus belonging to the genus *Alphavirus* and  
92 family *Togaviridae* and transmitted to humans by *Aedes* mosquitoes(1). Three CHIKV  
93 genotypes, namely West African, East Central South African and Asian have been identified.

94 The incubation period ranges from two to five days following which symptoms such as fever (up  
95 to 40°C), petechial or maculopapular rash of the trunk and arthralgia affecting multiple joints  
96 develop(2-4).

97 CHIKV is a small (60-70nm diameter), spherical, enveloped, positive sense single-stranded RNA  
98 (~12Kb) virus (5-7). Its genomic organization is 5'-cap-nsP1-nsP2-nsP3-nsP4-(junction region)-  
99 C-E3-E2-6K-E1-3'(8). The non-structural proteins (nsP1-4) are primarily involved in virus  
100 replication, while structural proteins C, E3, E2, 6K and E1 are responsible for packaging and  
101 producing new virions.

102 In India, CHIKV infection has re-emerged with the outbreak of 2005–08 affecting approximately  
103 1.3 million people in 13 different states (9). The clinical manifestations during these outbreaks  
104 were found to be more severe leading to the speculation that either a more virulent or an  
105 efficiently transmitted variant of this virus might have emerged (10).

106 CHIKV, among most other viruses across families, interacts with a number of cellular proteins  
107 and consequently metabolic pathways to aid its survival in the host (11-17). Several facets of  
108 CHIKV pertaining to strategies required for ecological success, replication, host interaction and  
109 genetic evolution are yet to be fully explored and are constantly evolving. This spurs the need to  
110 identify important host pathways that can be targeted for developing antiviral therapies against  
111 the virus.

112 Alternatively, host factors involved in viral replication may also be targeted. Previous studies  
113 have shown compounds targeting furin, protein kinases, and Hsp90, are inhibiting CHIKV  
114 replication *in vitro* (18-20). However, further validation through *in vivo* experiments and pre-  
115 clinical studies need to be performed prior to developing effective antivirals.  
116 Our group has formerly reported an Indian outbreak strain IS, to exhibit a faster replication rate  
117 than the CHIKV prototype strain, PS *in vitro* (21). The present study identifies host genes which  
118 are modulated differentially during CHIKV infection in mammalian system and explores the  
119 involvement of MAPK-activated protein kinases during virus infection using both *in vitro* and *in*  
120 *vivo* conditions through inhibitor studies.

## 121 **Materials and Methods**

### 122 **Cells, Viruses, Antibodies, Inhibitors**

123 Vero cells (African green monkey kidney cells), CHIKV strains, prototype strain, PS (**Accession**  
124 **no: AF369024.2**) and novel Indian ECSA strain, IS (**Accession no: EF210157.2**) and E2  
125 Monoclonal antibody were gifted by Dr. M. M. Parida, DRDE, Gwalior, India. The HSV-1 virus  
126 strain KOS with GenBank accession Number JQ673480.1 was kindly gifted by Dr. Roger  
127 Everett, Glasgow University, Scotland. The HEK 293T cell line was gifted by Dr. Rupesh Dash,  
128 Institute of Life Sciences, Bhubaneswar, India. **SARS details:** - The SARS-CoV-2 virus used in  
129 this study was isolated from a clinically confirmed local COVID-19 patient (GISAID accession  
130 ID- EPI\_ISL\_1196305). Virus from the 10<sup>th</sup> passage was used for experiments. Cells were  
131 maintained in Dulbecco's Modified Eagle's medium (DMEM; PAN Biotech, Germany)  
132 supplemented with 5% Fetal Bovine Serum (FBS; PAN Biotech), Gentamicin and Penicillin-  
133 Streptomycin (Sigma, USA).The anti-nsP2 monoclonal antibody used in the experiments was  
134 developed by us(22). Cofilin monoclonal antibody was purchased from Cell Signaling

135 Technologies (Cell Signaling Inc, USA). The pMK2 polyclonal antibody and MK3 monoclonal  
136 antibody were purchased from Santacruz Biotechnology (USA). The p-Cofilin antibody and  
137 GAPDH antibody were procured from Sigma Aldrich (USA) and Abgenex India Pvt. Ltd. (India)  
138 respectively. Anti-mouse and anti-rabbit HRP-conjugated secondary antibodies were purchased  
139 from Promega (USA). Alexa Fluor 488 and Alexa Fluor 594 antibodies were purchased from  
140 Invitrogen (USA). The MK2a inhibitor, CMPD1 was purchased from Calbiochem (Germany).

#### 141 **Virus infection**

142 The Vero cells were infected with PS/IS strains of CHIKV respectively according to the  
143 experimental requirements as reported earlier (21). Thereafter, CHIKV infected cells were  
144 incubated for 15-18hpi following which cells and supernatants were harvested from mock,  
145 infected and drug treated samples for downstream processing. For HSV (Herpes Simplex Virus)  
146 and SARS-CoV-2, Vero cells were infected with 0.1 MOI of virus and incubated for 22 hpi. The  
147 supernatants were harvested at 22 hpi and subsequent downstream processing was carried out for  
148 estimating the viral titers.

#### 149 **RNA isolation and Microarray hybridization**

150 In the present study, the global gene expression analyses were carried out using Agilent Rhesus  
151 GeneChip® ST arrays. Sample preparation was performed according to the manufacturer's  
152 instruction (Agilent, USA). Briefly, RNA was extracted from mock and virus infected Vero cells  
153 using the RNeasy mini kit (Qiagen, Germany). Next, RNA quality was assessed by Agilent  
154 Bioanalyzer and cDNA was prepared using oligo dT primer incorporating a T7 promoter. The  
155 amplified, biotinylated and fragmented sense-strand DNA targets were generated from the  
156 extracted RNA and hybridized to the gene chip containing over 22,500 probe sets at 65°C for

157 17h at 10 rpm. After hybridization, the chips were stained, washed and scanned using a Gene  
158 Chip Array scanner.(23)

### 159 **Microarray analysis**

160 Raw data sets were extracted from all text files after scanning the TIFF files. These raw data sets  
161 were analyzed separately using the GeneSpring GX12.0 software (Agilent Technologies, USA)  
162 followed by differential gene expression and cluster analysis. Differential gene expression  
163 analyses were performed by using standard fold change cut off  $\geq 2.0$  and  $\geq 10.0$  against IS  
164 (8hpi) vs Mock (8hpi), PS (8hpi) Vs Mock (8hpi), PS (18hpi) Vs Mock (18hpi), IS (8hpi) vs PS  
165 (8hpi) and IS (8hpi) vs PS (18hpi). The hierarchical clustering was performed using the Genesis  
166 software(24). Functional annotation of differentially expressed genes was carried out using the  
167 PANTHER gene ontology analysis software (25).

### 168 **RNA extraction and qRT-PCR**

169 Equal volumes of serum isolated from all groups of mice samples were taken for viral RNA  
170 isolation using the QiaAmpViral RNA isolation kit (Qiagen, USA) as per the manufacturer's  
171 instructions. RT reaction was performed with 1  $\mu$ g RNA using the First Strand cDNA Synthesis  
172 kit (Fermentas, USA) as per manufacturer's instructions. Equal volume of cDNA was used for  
173 PCR amplification of E1 gene of CHIKV using specific primers (26). The nucleocapsid (NC)  
174 gene of SARS-CoV-2 was amplified using forward primer- 5'-  
175 GTAACACAAGCTTTCGGCAG-3' and reverse primer- 5'-GTGTGACTTCCATGCCAATG-  
176 3'. The viral copy number estimation from Ct values was estimated from the standard curve  
177 generated for CHIKV E1 gene/ SARS-CoV-2 (NC) gene (data not shown).

178

179



## 180 **siRNA Transfection**

181 Monolayers of HEK 293T cells with 70% confluency ( $1 \times 10^6$  cells/well) in 6-well plates were  
182 transfected separately or in combination with 60pmols of siRNA corresponding to MK2 mRNA  
183 sequence [(5'-3')CCAUCACCGAGUUUAUGAAAdTdT] and MK3 mRNA sequence [(5'-3')  
184 GAGAAGCUGCAGAGAUAAUdTdT ] or with siRNA negative control. Transfection was  
185 performed using Lipofectamine-2000 (Invitrogen, USA) according to the manufacturer  
186 instructions. In brief, HEK cells were transfected using Lipofectamine 2000 according to  
187 different siRNA quantity in Opti-MEM medium (Thermo scientific, USA). The transfected cells  
188 were infected with either CHIKV strains PS or IS with MOI 0.1 at 24 hours post transfection  
189 (hpt). Eighteen hours post infection, the cells were harvested to measure the nsP2 and MK2/3  
190 protein levels by Western blot analysis.

## 191 **SDS-PAGE and Western blot analysis**

192 Protein expression was examined by Western blot analysis as described earlier (21, 27). CHIKV  
193 nsP2 and E2 proteins were detected with monoclonal antibodies (28) and re-probed with  
194 GAPDH antibody to confirm the equal loading of samples. The pMK2, MK3, Cofilin and  
195 pCofilin antibodies were used as recommended by the manufacturer. The Western blots were  
196 scanned using the Quantity One Software (Bio Rad, USA).

## 197 **Plaque assay**

198 The CHIKV-infected cell culture supernatants were collected at 18 hpi and subjected to plaque  
199 assay according to the procedure mentioned earlier (29).

## 200 **Immunofluorescence staining**

201 Immunofluorescence staining was carried out using the procedures described earlier (22). Vero  
202 cells were grown on glass coverslips placed in 35mm dishes and infected with CHIKV (MOI

203 0.1) as described above. At 18 hpi, coverslips were stained with primary antibodies followed by  
204 staining with secondary antibody (AF 594-conjugated anti-mouse antibody) for 45 mins. The  
205 phalloidin staining was carried out using the Cytopainter F actin labeling kit as per  
206 manufacturer's protocol (Abcam, UK). The coverslips were stained with DAPI for 90 sec and  
207 mounted with 15-20  $\mu$ l Antifade (Invitrogen, USA) to reduce photo-bleaching. Fluorescence  
208 microscopic images were acquired using the Leica TCS SP5 confocal microscope (Leica  
209 Microsystems, Germany) with 63X objective and analyzed using the Leica Application Suite  
210 Advanced Fluorescence (LASAF) V.1.8.1 software.

### 211 **Immunohistochemistry analysis:**

212 For histopathological examinations, tissue samples were dehydrated, embedded in paraffin wax,  
213 and thereafter serial paraffin sections (5 $\mu$ m) were obtained (30). Briefly, the sections were  
214 immersed in two consecutive xylene washes for de-paraffinization and were subsequently  
215 hydrated with five consecutive ethanol washes in descending order of concentration: 100%, 90%,  
216 70%, and deionized water. The paraffin sections were then stained with hematoxylin-eosin  
217 (H&E), and histopathological changes were visualized using a light microscope (Zeiss Vert.A1,  
218 Germany).

### 219 **Cellular cytotoxicity assay**

220 Cellular cytotoxicity assay was performed as described earlier (31). Vero cells were seeded onto  
221 96-well plates at a density of 3000 cells/well, treated with different concentrations of CMPD1 for  
222 24 hrs at 37°C with 5% CO<sub>2</sub>. DMSO-treated samples served as control. After incubation, 10 $\mu$ l of  
223 MTT reagent (Sigma Aldrich, USA) was added to the wells followed by incubation at 37°C for  
224 3hrs and processed further. Absorbance of the suspension was measured at 570nm using ELISA

225 plate reader (BioRad, USA). Cellular cytotoxicity was determined in duplicates and each  
226 experiment was repeated thrice independently.

### 227 **CMPD1 treatment**

228 Vero cells with 90% confluency were grown in 35mm or 60mm cell culture dishes (according to  
229 the experimental requirements) and infected with PS or IS strains of CHIKV as described above  
230 at MOI 0.1. After infection, cells were treated with either DMSO or different concentrations of  
231 CMPD1 as per the protocol mentioned earlier (32). The cells were observed for detection of  
232 cytopathic effect (CPE) under 10X objective of bright field microscope. Infected cells and  
233 supernatants were then collected at 15-18hpi depending on the experiment.

### 234 **Time of addition experiment**

235 Vero cells were infected with CHIKV as described above and CMPD1 (50 $\mu$ M) was added at 1hr  
236 interval upto 11hrs to the infected cells in different dishes. Thereafter, cell culture supernatants  
237 of all the samples were harvested at 15hpi and plaque assay was carried out for estimating viral  
238 titer.

### 239 **CHIKV infection in mice**

240 The mice related experiments were performed as per CPCSEA guidelines and were approved by  
241 the IAEC committee. Around 10-14 days old male C57BL/6 mice (n=5) were injected  
242 subcutaneously with  $1 \times 10^6$  particles of IS in DMEM. At 3hpi, mice were fed with CMPD1 at a  
243 concentration of 5mg/kg of body weight and continually fed at every 24hr-interval up to 3 days.  
244 All mice were sacrificed on the fourth day; blood samples were harvested from mock, infected  
245 and drug-treated samples and used for downstream processing. For survival curve analysis,  
246 CHIKV-infected mice were fed with CMPD1 and observed every day, for CHIKV-induced  
247 disease manifestations up to 8 days post infection (dpi). All infected mice were scored on a scale

248 of 0 to 6 based on CHIKV induced disease symptoms such as(0- No symptoms, 1- lethargic, 2-  
249 ruffled fur, 3- restricted movement/limping, 4- one hind limb paralysis and 5 – both hind limb  
250 paralysis 6- Morbid/dead).

### 251 **Proteome profiling**

252 In order to assess the levels of different cytokines in mock, CHIKV-infected and CHIKV-  
253 infected+drug treated mice samples, proteome profiling was performed using the Mouse XL  
254 cytokine array kit (R & D systems, USA) as per manufacturer’s instructions. The array blots  
255 were incubated with serum samples at 4°C overnight on a gel rocker, followed by incubation  
256 with HRP-conjugated secondary antibody. Blots were developed using the chemiluminescent  
257 HRP substrate and scanned by the Image Lab software (Bio-Rad, USA). The relative differences  
258 in expression patterns of selected cytokines among the different groups of samples were assessed  
259 using the GraphPadPrism8 software.

260 **Bioavailability Prediction:** - The bioavailability of CMPD1 was predicted through the SWISS  
261 ADME tool available in the website ([www.swissadme.ch](http://www.swissadme.ch)). The SMILE structure of CMPD1 was  
262 submitted to the tool for analysis and prediction.

### 263 **Statistical analysis**

264 Statistical analysis of the experimental data was performed by using the GraphPad Prism 8.0  
265 Software and presented as mean±SD of three independent experiments. The One-way ANOVA  
266 with Dunnet post-hoc test was used to compare the differences between the groups. In all the  
267 tests,  $p$  value < 0.05 was considered to be statistically significant.

268

269

## 270 **Accession numbers**

271 The accession number for the submitted microarray experimental data to Array Express database  
272 is **E-MTAB-6645**. The URL for the submitted microarray experimental data is as  
273 follows: <http://www.ebi.ac.uk/arrayexpress/experiments/E-MTAB-6645>.

## 274 **Results**

### 275 **Differential host gene expressions for PS and IS strains of CHIKV in Vero cells.**

276 Earlier, it was observed that CPE developed by IS was more prominent at 8 hpi as compared to  
277 PS which showed similar CPE around 18 hpi(21). To understand the host gene expression  
278 profiles for the two CHIKV strains, Vero cells were harvested at 8 and 18 hpi for microarray  
279 analysis. Microarray data revealed the differential expression of 20227 genes, of which 12221  
280 genes were differentially expressed after applying fold change cut off  $\geq 2.0$ . Further, 684 genes  
281 from the 12221 were differentially expressed with fold change  $\geq 10.0$ . The cluster analysis of  
282 differentially expressed genes was carried out using the GENESPRING GX 12.0 software, as  
283 shown in Fig 1A. Annotation of the total genes into different protein classes was carried out  
284 using the Panther software. It was observed that majority of the genes belonged to the nucleic  
285 acid binding molecules, signaling molecules, transcription factors among others, as represented  
286 in Fig 1B. A pie-chart was constructed using the Panther software to annotate these genes into  
287 different biological processes, and it was observed that majority of the modulated genes  
288 belonged to the pathways involved in different cellular processes (Fig 1C). Moreover, 720 genes  
289 were differently regulated by IS alone as depicted by the Venn diagram constructed through the  
290 Gene Venn software in (Fig 1D and 1E). Out of these 720 genes, few selected genes were  
291 functionally annotated into different host cellular pathways as shown in “S1 Table”. MK3 was

292 present among the 720 genes that were antagonically expressed in IS infected cells at 8 hpi in  
293 comparison to PS (8 and 18 hpi). The importance of MK3 and its isozyme partner MK2 was thus,  
294 deliberated during CHIKV infection in this study. Together, the data indicate that CHIKV  
295 utilizes different host cell pathways for efficient replication inside the host cell and there are  
296 differential host gene expression patterns for various strains of CHIKV.

297 **MK2 and MK3 gene silencing abrogates CHIKV progeny release without affecting viral**  
298 **protein synthesis.**

299 To elucidate the importance of MK2 and MK3 in CHIKV infection, gene silencing through  
300 siRNA approach was employed. Since the transfection efficiency of Vero cells is poor,  
301 HEK293T cell line (Kidney epithelial cell line) was used for this experiment. HEK293T cells  
302 were transfected with 60 pmol of MK2 and/or MK3 siRNAs and incubated for 24 hrs at 37°C.

303 Next, the siRNA transfected cells were infected with CHIKV [(PS/IS), MOI 0.1] and cells as  
304 well as supernatants were harvested at 18 hpi for further analysis. No remarkable change in nsP2  
305 expression was observed after genetic knock down of either MK2 or MK3. Surprisingly, the  
306 expression of CHIKV-nsP2 was increased marginally when both MK2 and MK3 were silenced  
307 together as compared to control as shown in Fig 2A and 2B (left and right panels respectively).

308 As the expression of nsP2 was increased after siRNA treatment, plaque assay was performed to  
309 assess the effect of MK2 and/or MK3 down-regulation in viral progeny formation. Interestingly,  
310 it was observed that the viral titers were reduced by 58% for PS strain and 53% for IS strain as  
311 shown in Fig 2C and 2D. Therefore, it can be suggested that MK2 and MK3 altogether affects  
312 CHIKV progeny release without affecting viral protein synthesis.

313 **CMPD1, an MK2a inhibitor abrogates CHIKV infection *in vitro*.**

314 The MAPK-activated protein kinases MAPKAPK3 (MK3) and MAPKAPK2 (MK2) are the  
315 substrates of P38 MAPK that form a pair of structurally and functionally closely related  
316 enzymes. Being highly homologous enzymes (around 70% at the amino acid sequence), their  
317 substrate spectrums are indistinguishable(33). MK2 expression levels usually exceeds MK3 level  
318 in cells, however, in absence of functional MK2, MK3 compensates.

319 To investigate the role of MK2 pathway in CHIKV infection, Vero cells were treated with a non-  
320 ATP competitive MK2 inhibitor, CMPD1, which selectively inhibits P38-mediated MK2  
321 activation (34). In order to determine the cytotoxicity of CMPD1, Vero cells were treated with  
322 different concentrations of the drug (25, 50, 75 and 100 $\mu$ M) for 24 h and MTT assay was  
323 performed. It was observed that 98%, 95% and 85% cells were viable with 25, 50 and 100 $\mu$ M  
324 concentrations of the drug, respectively, as shown in Figure 3a. Next, dose kinetics assay was  
325 performed to determine the anti-CHIKV efficacy of CMPD1. Therefore, Vero cells were infected  
326 with two different strains of CHIKV with MOI 0.1 and treated with 25, 50 and 100 $\mu$ M  
327 concentrations of CMPD1. The cell culture supernatants were harvested at 18 hpi and plaque  
328 assay was carried out to estimate the virus titers. Around 90% decrease in virus titer was  
329 observed with higher concentrations of CMPD1 in comparison to DMSO control for both the  
330 strains (Fig 3B and 3C). Since, effect of CMPD1 was same for both the strains, IS strain (more  
331 virulent of the two strains used in this study) was used for further experiments.

332 To estimate the IC<sub>50</sub> value of CMPD1, Vero cells were infected with CHIKV as mentioned  
333 above and different concentrations of CMPD1 (10-100 $\mu$ M) were added to the cells post-  
334 infection. The supernatants were harvested at 18 hpi and plaque assay was performed. The  
335 plaque numbers were converted into log 10 of PFU/mL and plotted in the graph as shown in Fig  
336 3D. The IC<sub>50</sub> of CMPD1 was found to be 33.97  $\mu$ M.

337 Next, to assess the possible mechanism of action of CMPD1 on CHIKV replication, time of  
338 addition experiment was performed. Vero cells were infected with IS strain with MOI 0.1 and 50  
339  $\mu\text{M}$  of CMPD1 was added at 1hr interval from 0–11 hpi. DMSO was used as a control. Next, the  
340 CHIKV-infected and CMPD1 treated supernatants were harvested at 15 hpi and plaque assay  
341 was performed as mentioned above to assess the release of infectious virus particles. As shown  
342 in Fig 3E, it was observed that around 55% of the infectious virus particle release was abrogated  
343 in the presence of 50  $\mu\text{M}$  of CMPD1, even after the addition of the drug at 11 hpi. This indicates  
344 that CMPD1 inhibits later phase of CHIKV life cycle.

345 Lastly, to understand the role of CMPD1 in CHIKV packaging/release, Vero cells were infected,  
346 drug-treated, and supernatants were collected at 18 hpi for estimating the extracellular viral titer  
347 through plaque assay. For estimating the intracellular virus titer, cells were washed twice with  
348 1X PBS and harvested. The pelleted cells were resuspended in fresh serum free medium and  
349 freeze-thawed thrice to release virus particles trapped inside the cells. Then the plaque assay was  
350 performed using the supernatant to estimate the intracellular virus titer. Similar to the previous  
351 experiment, the extracellular virus titer was around 70% less in CMPD1 treated samples in  
352 comparison to control but the intracellular virus titer was around 60% more for CMPD1 treated  
353 samples as shown in Fig 3F and 3G. This suggests that CMPD1 did not inhibit the  
354 formation/packaging of newly synthesized host particles inside the host cell; however, it affects  
355 the release of CHIKV viral progeny from the host cell.

356

357 **CMPD1 blocks the actin polymerization process modulated by CHIKV for its progeny**  
358 **release.**



359 It is well known that both the isozymes, MK2 and MK3 are exclusively phosphorylated by P38  
360 MAPK and both have similar substrates (35). It is also known that LIM kinase 1 (LIMK1), a  
361 downstream substrate of MK2 induces actin polymerization by phosphorylating and inactivating  
362 cofilin, an actin-depolymerizing factor (36, 37). Therefore, to understand the effect of CMPD1 in  
363 viral infection and on downstream substrates of MK2, the cells were infected with IS at MOI 0.1  
364 and treated with 50  $\mu$ M CMPD1. Infected cells were observed for the development of CPE at 18  
365 hpi and clear reduction in CPE was observed after CMPD1 treatment (Fig 4A). The cells were  
366 harvested at 18 hpi and cell lysates were processed for Western blot analysis. It was noticed that  
367 the levels of pMK2 and MK3 were downregulated after drug treatment with no change in  
368 CHIKV nsP2 expression as shown in Fig 4B and 4C. Similarly, the expression of Cofilin and p-  
369 Cofilin was decreased in the presence of CMPD1. The expression of pMK3 could not be tested  
370 due to unavailability of a commercial antibody. Altogether, the data suggest that MK2  
371 phosphorylation plays an important role in viral progeny release by modulating the actin  
372 polymerization process.

373 In order to confirm the involvement of actin fibers in CHIKV progeny release, Vero cells were  
374 virus infected and drug treated as mentioned above and cells were fixed at 18 hpi. Thereafter,  
375 phalloidin staining was carried out to stain actin fibers in cells as it has been reported that  
376 fluorescent dye-labeled phalloidin stains only the actin fibers, but not the monomers (38).  
377 Phalloidin staining was found to be more prominent in infected cells without CMPD1 treatment  
378 and was more diffusely stained in CMPD1 treated infected cells. Furthermore, the expression  
379 pattern of CHIKV E2 protein was unchanged in both the samples as shown in Fig 4D. Taken  
380 together, the results depict that CHIKV utilizes the actin polymerization process for its progeny

381 release through activation of MK2/MK3; however CMPD1 abrogates the whole process by  
382 inhibiting MK2/3 activation.

383 **CMPD1 inhibits CHIKV infection *in vivo*.**

384 In order to assess the bio-availability of a drug/inhibitor, computer models have been used as a  
385 valid alternative to experimental procedures for prediction of ADME (Absorption, Distribution,  
386 Metabolism and Excretion) parameters (39). The SwissADME Web tool ([www.swissadme.ch](http://www.swissadme.ch)) is  
387 one such tool which enables the computation of key physicochemical, pharmacokinetic, drug-  
388 like and related parameters for one or multiple molecules (40). Hence, the bioavailability of  
389 CMPD1 was predicted through the SwissADME tool and it was found that CMPD1 has high GI  
390 (Gastro Intestinal) absorption with a bioavailability score of 0.55 as shown in “S2 Table”.

391 In order to assess the antiviral effect of CMPD1 on CHIKV infection *in vivo*, 10-14 days old  
392 male C57BL/6 mice (n=5 per group) were infected with the IS strain and serum as well as tissue  
393 samples were harvested as per the protocol mentioned above. Viral RNA was isolated from the  
394 pooled serum samples (from respective group) and RT-PCR was carried out to amplify E1 gene  
395 of CHIKV. It was observed that the viral copy number was reduced remarkably (90%) in  
396 CMPD1 treated CHIKV infected mice in comparison to control (Fig 5A). Next, to compare the  
397 extent of tissue inflammation due to CHIKV infection in presence of drug, muscle tissue sections  
398 (from the site of injection) of the sacrificed mice at 4dpi were stained using Haematoxyline and  
399 Eosin and it was found that the infiltration of immune cells were less in CMPD1 treated tissue in  
400 comparison to control as shown in Fig 5B. Furthermore, to determine the relative levels of  
401 different cytokines/chemokines in CMPD1 treated mice, proteome profiling was carried out with  
402 the pooled serum samples as described above. It was noticed that the expressions of few selective  
403 inflammatory cytokines/chemokines, like CXCL13, RAGE, FGF and MMP9 were significantly

404 reduced in CMPD1 treated mice sera, as shown in Fig 5C and 5D. Interestingly, HGF was  
405 upregulated in CMPD1 treated mice. To assess the protective action of CMPD1, survival curve  
406 analysis was performed. For that, CHIKV infected mice (5 per group) were fed with CMPD1  
407 (5mg/kg) orally at 3hrs post CHIKV infection and then for 3 consecutive days at an interval of  
408 24 hrs. The disease scoring was performed based on the symptoms described in the methods  
409 section and shown in “S3 Table”. Moreover, from the survival curve analysis as shown in Figure  
410 5e, there was 100% mortality of the untreated CHIKV infected mice after 8 days post infection.  
411 In contrast, no mortality was observed for the CMPD1 treated CHIKV infected mice even after 8  
412 days post infection. The data suggests that CMPD1 shows anti-CHIKV activity *in vivo*.

#### 413 **CMPD1 modulates HSV and SARS CoV2 infection *in vitro*.**

414 In order to assess the efficacy of CMPD1 against other viruses like HSV-1 and SARS-CoV-2,  
415 Vero cells were infected with 0.1 MOI of HSV and SARS-CoV-2 separately and treated with  
416 different concentrations of CMPD1 post infection. The cells were incubated for 22 hpi and  
417 distinct morphological changes were visible under microscope between infected and drug treated  
418 cells as shown in Fig 6A and 6C. In case of HSV-1, the supernatants of infected and drug treated  
419 cells were harvested at 22 hpi and plaque assay was carried out to estimate the viral titers. It was  
420 observed that there was around 45% inhibition with 25 $\mu$ M and 90% inhibition in viral titers with  
421 50 $\mu$ M of CMPD1 as shown in Fig 6B. However, in case of SARS-CoV-2, viral RNA was  
422 extracted from the supernatants at the same time point and cDNA synthesis was carried out.  
423 Then, the Nucleocapsid (NC) gene of SARS-CoV-2 was amplified by qRT-PCR using the gene  
424 specific primers [Forward: GTAACACAAGCTTTCGGCAG and Reverse:-  
425 GTGTGACTTCCATGCCAATG]. The copy number of the virus was calculated from the Ct  
426 value using the standard curve. It was observed that there was around 60% reduction with 50 $\mu$ M

427 of CMPD1 and 88% reduction with 75  $\mu$ M of CMPD1 as shown in Fig 6 D. The results indicate  
428 that CMPD1 is effective against other viruses like HSV-1 and SARS CoV2 *in vitro*.

## 429 **Discussion**

430 CHIKV is now considered as a major public health concern. Due to lack of therapeutics and  
431 vaccine, a number of studies have been initiated to understand the function of viral proteins and  
432 the mechanisms of virus-mediated manipulation of host machineries for successful replication  
433 (41-43). The current investigation, aims to determine how host proteins are modulated during  
434 CHIKV infection in mammalian cell lines. In this regard, microarray analysis was carried out for  
435 mock and CHIKV-infected Vero cells and two genes MK2 and MK3 belonging to P38MAPK  
436 pathway were selected for further analysis.

437 Gene silencing of MK2 and MK3 abrogated around 58% CHIKV progeny release from the host  
438 cell and a MK2 activation inhibitor (CMPD1) treatment demonstrated 68% inhibition of viral  
439 infection suggesting a major role of MAPKAPKs during late CHIKV infection *in vitro*. Further,  
440 it was observed that the inhibition in viral infection is primarily due to the abrogation of  
441 lamellipodium formation through modulation of factors involved in the actin cytoskeleton  
442 remodeling pathway which is essential for virus release. Moreover, CHIKV-infected C57BL/6  
443 mice demonstrated reduction in the viral copy number, lessened disease score and better  
444 survivability after CMPD1 treatment. In addition, reduction in expression of key pro-  
445 inflammatory mediators such as CXCL13, RAGE, FGF, MMP9 and increase in HGF (a CHIKV  
446 infection recovery marker) was observed indicating the effectiveness of this drug against  
447 CHIKV. Additionally, CMPD1 also inhibited the HSV1 and SARS CoV2-19 infection *in vitro*.

448 The roles of MK2 and MK3 have been implicated in few other viruses like Dengue (DENV),  
449 Murine Cytomegalovirus (MCMV), Kaposi Sarcoma Herpes Virus (KSHV), Rous Sarcoma

450 Virus (RSV), Influenza A and Human Immunodeficiency Virus (HIV). In DENV, it was found  
451 that SB203580 (a P38MAPK inhibitor) treatment significantly reduced the phosphorylation of  
452 MAPKAPK2 and other substrates such as HSP27 and ATF2 which reduced DENV-induced liver  
453 injury in mice (44). In the case of MCMV, MK2 was reported to regulate cytokine responses  
454 towards acute infection, via IFNARI-mediated pathways and prevents formation of intrahepatic  
455 myeloid aggregates during infection (45). For KSHV, it was observed that the viral Kaposin B  
456 (KapB) protein binds and activates MK2, thereby selectively blocking decay of AU-rich mRNAs  
457 (ARE-mRNAs) that encode pro-inflammatory cytokines and angiogenic factors during latent  
458 KSHV infections (46). Furthermore, it was noticed that during RSV infection, pP38 is  
459 sequestered inside cytoplasmic inclusion bodies (IBs) resulting in substantial reduction in  
460 accumulation of MK2 and suppressing cellular responses to virus infection. Additionally,  
461 CMPD1 treatment reduced viral protein expression suggesting the importance of pMK2 in RSV  
462 protein translation (32). In case of Influenza A, it was observed that MK2 and MK3 are activated  
463 on virus infection enabling the virus to escape the antiviral action of PKR (47). Recently, it has  
464 been shown that CCR5-tropic HIV induces significant reprogramming of host CD4+ T cell  
465 protein production pathways and induces MK2 expression upon viral binding to the cell surface  
466 that are critical for HIV replication in host cells (48). However, reports pertaining to the  
467 involvement of MK2 and MK3 in alphavirus infection are not available. Hence, this  
468 investigation is one of the first to highlight the importance of MK2 and MK3 in CHIKV.

469 According to the results, it can be suggested that both MK2 and MK3 play important roles in  
470 CHIKV progeny release during CHIKV infection. After CHIKV infection, MK2 is  
471 phosphorylated which in turn phosphorylates LIMK1.(37) The LIMK1 then inactivates Cofilin  
472 by phosphorylating it (36) This results in accumulation of more p-Cofilin inside the cell than

473 active Cofilin. As a result, Cofilin is unable to cleave the actin filaments into monomers. This  
474 leads to polymerization of actin filaments and subsequent lamellipodia formation which results  
475 in effective CHIKV progeny release, as shown in Fig 7A. However, CMPD1 treatment abrogates  
476 MK2/3 phosphorylation as a result of which LIMK is not able to inactivate Cofilin. Active  
477 Cofilin then cleaves actin polymers to monomers, thereby preventing lamellipodium formation  
478 and subsequent viral progeny release as shown in Fig 7B. Furthermore, *in vivo* studies  
479 demonstrate that CMPD1 treated mice do not develop complications post CHIKV infection. This  
480 can be speculated by the reduction in the expressions of certain virus induced inflammatory  
481 chemokines and cytokines like CXCL13, RAGE and FGF in CMPD1 treated mice sera. The  
482 involvements of these chemokines and cytokines have been reported for other virus infections  
483 before (49-51). Additionally, the expression of MMP9, a host factor involved in the degradation  
484 of extracellular matrix thereby promoting viral spread to neighbouring tissues (51) was also  
485 reduced in drug-treated samples indicating abrogation of viral transmission during CMPD1  
486 treatment. In contrast, the expression of HGF (a known marker for CHIKV recovery during acute  
487 infection) (52) was upregulated during CMPD1 treatment thereby showing the effectiveness of  
488 CMPD1 against CHIKV in a mouse model. Nevertheless, it would be interesting to understand  
489 the detailed mechanism and role of these factors during CHIKV infection in future.

490 Thus, the current study highlights the importance of MK2 and MK3 (substrates of the p38MAPK  
491 pathway) as novel host factors involved during CHIKV infection. It also demonstrated CMPD1  
492 as a novel inhibitor of CHIKV infection; hence, CMPD1 can be pursued as a potential lead for  
493 developing anti-CHIKV molecule to regulate disease manifestations.

494

495

## 496 **Figure legends**

### 497 **Fig 1:- Differential host gene expressions for PS and IS strains of CHIKV in Vero cells. (A)**

498 Hierarchical clustering showing the overall expression patterns of the modulated host genes by  
499 PS/IS strains of CHIKV during infection in mammalian cells. **(B)** Pie-chart depicting the  
500 distribution of the host genes in CHIKV-infected samples into different protein classes. **(C)** Pie-  
501 chart depicting the distribution of the modulated host genes into different cellular processes. **(D**  
502 **and E)** Venn diagram showing both commonly and differentially regulated host genes in  
503 CHIKV (PS/IS) infected Vero cells.

### 504 **Fig 2:- MK2 and MK3 gene silencing abrogates CHIKV progeny release without affecting**

505 **viral protein synthesis. (A and B)** After 24 hrs post transfection with 60 pmol of MK2/3 siRNA  
506 (either separately/in combination), cells were super-infected (PS/IS MOI 0.1) and harvested at 18  
507 hpi. Western blot showing the expression levels of different proteins (Left panel). Bar diagrams  
508 showing relative band intensities of different proteins (Right panel). GAPDH was used as  
509 control. **(C and D)** Bar diagram showing the viral titres after siRNA treatment for PS and IS  
510 strains, (n=3;  $p<0.05$ ).

### 511 **Fig 3:- CMPD1, an MK2a inhibitor abrogates CHIKV infection *in vitro*. (A)**

512 treated with different concentrations of CMPD1 (25, 50, 75 and 100  $\mu$ M) for 24 h and MTT  
513 assay was performed. **(B and C)** Vero cells infected with CHIKV PS/IS at MOI 0.1 and drug  
514 treated. Bar graph showing the viral titers in the presence of CMPD1 (25, 50 and 100  $\mu$ M). **(D)**  
515 Dose response curve showing the IC<sub>50</sub> of CMPD1 against CHIKV. **(E)** Bar graph showing the  
516 viral titers estimated through plaque assay from the supernatants obtained from the time of  
517 addition experiment for CMPD1(50 $\mu$ M) post CHIKV infection. **(F and G)** Bar graph showing  
518 intracellular and extracellular virus titers for samples harvested at 18hpi. DMSO was used as

519 control. All the graphs depict the values of mean  $\pm$  SD ( $*p < 0.05$ ) of three independent  
520 experiments.

521 **Fig 4:-CMPD1 blocks the actin polymerization process modulated by CHIKV for its**  
522 **progeny release.** Vero cells were infected with the IS strain (0.1 MOI), 50  $\mu$ M of CMPD1 was  
523 added to the cells and incubated for 18 hpi. (A) Bright field images (20X magnification) showing  
524 the cytopathic effect after CHIKV infection with or without CMPD1 treatment (50  $\mu$ M). (B)  
525 Western blot analysis showing the expressions of nsP2, pMK2, MK3, Cofilin and p-Cofilin  
526 proteins. GAPDH served as the loading control. (C) Bar graphs showing the relative fold change  
527 in viral and host proteins expression with respect to DMSO control. (D) Confocal microscopy  
528 images showing the levels of E2 and phalloidin during CHIKV infection.

529 **Fig 5:- CMPD1 inhibits CHIKV infection in mice.** (A) Bar graph showing the viral copy  
530 numbers in CHIKV infected and CMPD1 treated mouse serum samples. (B) H and E staining of  
531 mouse tissue samples with CHIKV infection and in presence/absence of CMPD1(C) Array blot  
532 showing the expression of different cytokines after CHIKV infection in presence and absence of  
533 CMPD1. (D) Bar graph showing the relative band intensities of selected cytokines in mock,  
534 CHIKV infected and CMPD1 treated samples. (E) Survival curve showing the effect of CMPD1  
535 in CHIKV infected mice

536 **Fig 6:- CMPD1 modulates HSV-1 and SARS-CoV-2 infection *in vitro*.** Vero cells were  
537 infected with HSV-1 and SARS-CoV-2 (MOI 0.1) and treated with different concentrations of  
538 CMPD1. (A and C) Bright field images showing CPE in presence of CMPD1 for HSV-1 and  
539 SARS-CoV-2 infection. Black arrows indicate infected cells for HSV-1 and glowing cells  
540 represent SARS-CoV-2 infected cells. (B and D) Bar graph showing viral titer/copy number in  
541 presence of CMPD1 for HSV-1 and SARS-CoV-2 infection respectively.



542 **Fig 7:-Proposed model for CHIKV infection.** (A) During CHIKV infection, MK2/3 gets  
543 phosphorylated by P38 MAPK thereby exposing the Nuclear Export Signal (NES) of MK2. The  
544 phosphorylated forms of MK2/MK3 translocate to the cytoplasm and help in inactivating Cofilin  
545 through phosphorylation via LIMK-1 thereby promoting actin polymerization and lamellipodium  
546 formation. (B) Addition of CMPD1 blocks the phosphorylation of MK2, thereby blocking  
547 Cofilin phosphorylation and eventually inhibiting lamellipodium formation and CHIKV progeny  
548 release.

## 549 **Supplementary information**

550 S1 Table: - Differently modulated host genes for DRDE-06 classified into different metabolic  
551 pathways.

552 S2 Table: - Bioavailability prediction of CMPD1 through SWISSADME web tool.

553 S3 Table: - Disease scoring of CHIKV infected and drug treated mice

## 554 **Authors Contribution:-**

555 SoC, SuC and PM conceived the idea and designed the experiments; PM, TKN, AK, SK, SC,  
556 AD, SD and SM performed wet lab experiments; SoC and SuC contributed reagents; SoC, SuC  
557 and PM analyzed and interpreted the data; SoC, PM, TKN, EL, AR and SuC wrote the  
558 manuscript. All authors read and approved the final version of this manuscript.

## 559 **Acknowledgement:-**

560 We are thankful to Dr. M.M. Parida, DRDE; Gwalior, India for kindly providing IS and PS  
561 strains of CHIKV and Vero cell line. We like to acknowledge Dr. Roger Everett, Glasgow  
562 University, Scotland for providing the KOS strain of HSV-1. We are also grateful to Dr. Rupesh  
563 Dash of ILS, Bhubaneswar, India for providing the HEK293T cell line.

564

## 565 **Funding:-**

566 This study has been funded by the Department of Science and Technology (DST-SERB), New  
567 Delhi, India, vide grant no EMR/2016/000854. It was also supported by Institute of life sciences,  
568 Bhubaneswar, under Department of Biotechnology and National Institute of Science Education  
569 and Research (NISER), Bhubaneswar, under Department of Atomic Energy (DAE), Government  
570 of India. We wish to acknowledge the University Grant Commission (UGC), New Delhi, India  
571 for the fellowship to PM during this study.

## 572 **Transparency Declarations:-**

573 Nothing to declare.

574

## 575 **References:-**

- 576 1. Singh SK, Unni SK. Chikungunya virus: host pathogen interaction. *Reviews in medical virology*.  
577 2011;21(2):78-88.
- 578 2. Jain M, Rai S, Chakravarti A. Chikungunya: a review. *Tropical doctor*. 2008;38(2):70-2.
- 579 3. Enserink M. Infectious diseases. Chikungunya: no longer a third world disease. *Science*.  
580 2007;318(5858):1860-1.
- 581 4. Robinson MC. An epidemic of virus disease in Southern Province, Tanganyika Territory, in 1952-  
582 53. I. Clinical features. *Transactions of the Royal Society of Tropical Medicine and Hygiene*.  
583 1955;49(1):28-32.
- 584 5. Higashi N, Matsumoto A, Tabata K, Nagatomo Y. Electron microscope study of development of  
585 Chikungunya virus in green monkey kidney stable (VERO) cells. *Virology*. 1967;33(1):55-69.
- 586 6. Powers AM, Brault AC, Tesh RB, Weaver SC. Re-emergence of Chikungunya and O'nyong-nyong  
587 viruses: evidence for distinct geographical lineages and distant evolutionary relationships. *The Journal of*  
588 *general virology*. 2000;81(Pt 2):471-9.
- 589 7. Strauss JH, Strauss EG. The alphaviruses: gene expression, replication, and evolution.  
590 *Microbiological reviews*. 1994;58(3):491-562.
- 591 8. Salignat M, Gay B, Higgs S, Briant L, Devaux C. Replication cycle of chikungunya: a re-emerging  
592 arbovirus. *Virology*. 2009;393(2):183-97.
- 593 9. Arankalle VA, Shrivastava S, Cherian S, Gunjekar RS, Walimbe AM, Jadhav SM, et al. Genetic  
594 divergence of Chikungunya viruses in India (1963-2006) with special reference to the 2005-2006  
595 explosive epidemic. *The Journal of general virology*. 2007;88(Pt 7):1967-76.

- 596 10. Santhosh SR, Dash PK, Parida MM, Khan M, Tiwari M, Lakshmana Rao PV. Comparative full  
597 genome analysis revealed E1: A226V shift in 2007 Indian Chikungunya virus isolates. *Virus research*.  
598 2008;135(1):36-41.
- 599 11. Ludwig S, Pleschka S, Planz O, Wolff T. Ringing the alarm bells: signalling and apoptosis in  
600 influenza virus infected cells. *Cellular microbiology*. 2006;8(3):375-86.
- 601 12. Rana J, Gulati S, Rajasekharan S, Gupta A, Chaudhary V, Gupta S. Identification of potential  
602 molecular associations between chikungunya virus non-structural protein 2 and human host proteins.  
603 *Acta virologica*. 2017;61(1):39-47.
- 604 13. Kim DY, Reynaud JM, Rasalousskaya A, Akhrymuk I, Mobley JA, Frolov I, et al. New World and Old  
605 World Alphaviruses Have Evolved to Exploit Different Components of Stress Granules, FXR and G3BP  
606 Proteins, for Assembly of Viral Replication Complexes. *PLoS pathogens*. 2016;12(8):e1005810.
- 607 14. Tossavainen H, Aitio O, Hellman M, Saksela K, Permi P. Structural Basis of the High Affinity  
608 Interaction between the Alphavirus Nonstructural Protein-3 (nsP3) and the SH3 Domain of Amphiphysin-  
609 2. *The Journal of biological chemistry*. 2016;291(31):16307-17.
- 610 15. Ashbrook AW, Lentscher AJ, Zamora PF, Silva LA, May NA, Bauer JA, et al. Antagonism of the  
611 Sodium-Potassium ATPase Impairs Chikungunya Virus Infection. *mBio*. 2016;7(3).
- 612 16. Reid SP, Tritsch SR, Kota K, Chiang CY, Dong L, Kenny T, et al. Sphingosine kinase 2 is a  
613 chikungunya virus host factor co-localized with the viral replication complex. *Emerging microbes &*  
614 *infections*. 2015;4(10):e61.
- 615 17. Ooi YS, Dube M, Kielian M. BST2/tetherin inhibition of alphavirus exit. *Viruses*. 2015;7(4):2147-  
616 67.
- 617 18. Ozden S, Lucas-Hourani M, Ceccaldi PE, Basak A, Valentine M, Benjannet S, et al. Inhibition of  
618 Chikungunya virus infection in cultured human muscle cells by furin inhibitors: impairment of the  
619 maturation of the E2 surface glycoprotein. *The Journal of biological chemistry*. 2008;283(32):21899-908.
- 620 19. Cruz DJ, Bonotto RM, Gomes RG, da Silva CT, Taniguchi JB, No JH, et al. Identification of novel  
621 compounds inhibiting chikungunya virus-induced cell death by high throughput screening of a kinase  
622 inhibitor library. *PLoS neglected tropical diseases*. 2013;7(10):e2471.
- 623 20. Rathore AP, Haystead T, Das PK, Merits A, Ng ML, Vasudevan SG. Chikungunya virus nsP3 & nsP4  
624 interacts with HSP-90 to promote virus replication: HSP-90 inhibitors reduce CHIKV infection and  
625 inflammation in vivo. *Antiviral research*. 2014;103:7-16.
- 626 21. Kumar A, Mamidi P, Das I, Nayak TK, Kumar S, Chhatai J, et al. A novel 2006 Indian outbreak  
627 strain of Chikungunya virus exhibits different pattern of infection as compared to prototype strain. *PloS*  
628 *one*. 2014;9(1):e85714.
- 629 22. Chattopadhyay S, Kumar A, Mamidi P, Nayak TK, Das I, Chhatai J, et al. Development and  
630 characterization of monoclonal antibody against non-structural protein-2 of Chikungunya virus and its  
631 application. *Journal of virological methods*. 2014;199:86-94.
- 632 23. Braicu C, Cojocneanu-Petric R, Jurj A, Gulei D, Taranu I, Gras AM, et al. Microarray based gene  
633 expression analysis of *Sus Scrofa* duodenum exposed to zearalenone: significance to human health. *BMC*  
634 *genomics*. 2016;17:646.
- 635 24. Eisen MB, Spellman PT, Brown PO, Botstein D. Cluster analysis and display of genome-wide  
636 expression patterns. *Proceedings of the National Academy of Sciences of the United States of America*.  
637 1998;95(25):14863-8.
- 638 25. Mi H, Poudel S, Muruganujan A, Casagrande JT, Thomas PD. PANTHER version 10: expanded  
639 protein families and functions, and analysis tools. *Nucleic acids research*. 2016;44(D1):D336-42.
- 640 26. Saswat T, Kumar A, Kumar S, Mamidi P, Muduli S, Debata NK, et al. High rates of co-infection of  
641 Dengue and Chikungunya virus in Odisha and Maharashtra, India during 2013. *Infection, genetics and*  
642 *evolution : journal of molecular epidemiology and evolutionary genetics in infectious diseases*.  
643 2015;35:134-41.

- 644 27. Nayak TK, Mamidi P, Kumar A, Singh LP, Sahoo SS, Chattopadhyay S, et al. Regulation of Viral  
645 Replication, Apoptosis and Pro-Inflammatory Responses by 17-AAG during Chikungunya Virus Infection  
646 in Macrophages. *Viruses*. 2017;9(1).
- 647 28. Mishra P, Kumar A, Mamidi P, Kumar S, Basantray I, Saswat T, et al. Inhibition of Chikungunya  
648 Virus Replication by 1-[(2-Methylbenzimidazol-1-yl) Methyl]-2-Oxo-Indolin-3-ylidene] Amino]  
649 Thiourea(MBZM-N-IBT). *Scientific reports*. 2016;6:20122.
- 650 29. Chattopadhyay S, Weller SK. DNA binding activity of the herpes simplex virus type 1 origin  
651 binding protein, UL9, can be modulated by sequences in the N terminus: correlation between  
652 transdominance and DNA binding. *Journal of virology*. 2006;80(9):4491-500.
- 653 30. Priya R, Patro IK, Parida MM. TLR3 mediated innate immune response in mice brain following  
654 infection with Chikungunya virus. *Virus research*. 2014;189:194-205.
- 655 31. Das I, Basantray I, Mamidi P, Nayak TK, B MP, Chattopadhyay S, et al. Heat shock protein 90  
656 positively regulates Chikungunya virus replication by stabilizing viral non-structural protein nsP2 during  
657 infection. *PloS one*. 2014;9(6):e100531.
- 658 32. Fricke J, Koo LY, Brown CR, Collins PL. p38 and OGT sequestration into viral inclusion bodies in  
659 cells infected with human respiratory syncytial virus suppresses MK2 activities and stress granule  
660 assembly. *Journal of virology*. 2013;87(3):1333-47.
- 661 33. Gaestel M. MAPKAP kinases - MKs - two's company, three's a crowd. *Nature reviews Molecular  
662 cell biology*. 2006;7(2):120-30.
- 663 34. Davidson W, Frego L, Peet GW, Kroe RR, Labadia ME, Lukas SM, et al. Discovery and  
664 characterization of a substrate selective p38alpha inhibitor. *Biochemistry*. 2004;43(37):11658-71.
- 665 35. Gaestel M. What goes up must come down: molecular basis of MAPKAP kinase 2/3-dependent  
666 regulation of the inflammatory response and its inhibition. *Biological chemistry*. 2013;394(10):1301-15.
- 667 36. Yang N, Higuchi O, Ohashi K, Nagata K, Wada A, Kangawa K, et al. Cofilin phosphorylation by  
668 LIM-kinase 1 and its role in Rac-mediated actin reorganization. *Nature*. 1998;393(6687):809-12.
- 669 37. Kobayashi M, Nishita M, Mishima T, Ohashi K, Mizuno K. MAPKAPK-2-mediated LIM-kinase  
670 activation is critical for VEGF-induced actin remodeling and cell migration. *The EMBO journal*.  
671 2006;25(4):713-26.
- 672 38. Neufeld DA, Hosman S, Yescas T, Mohammad K, Day F, Said S. Actin fiber patterns detected by  
673 Alexafluor 488 phalloidin suggest similar cell migration in regenerating and nonregenerating rodent  
674 toes. *The anatomical record Part A, Discoveries in molecular, cellular, and evolutionary biology*.  
675 2004;278(1):450-3.
- 676 39. Dahlin JL, Inglese J, Walters MA. Mitigating risk in academic preclinical drug discovery. *Nature  
677 reviews Drug discovery*. 2015;14(4):279-94.
- 678 40. Daina A, Michielin O, Zoete V. SwissADME: a free web tool to evaluate pharmacokinetics, drug-  
679 likeness and medicinal chemistry friendliness of small molecules. *Scientific reports*. 2017;7:42717.
- 680 41. Abere B, Wikan N, Ubol S, Auewarakul P, Paemanee A, Kittisenachai S, et al. Proteomic analysis  
681 of chikungunya virus infected microglial cells. *PloS one*. 2012;7(4):e34800.
- 682 42. Dhanwani R, Khan M, Lomash V, Rao PV, Ly H, Parida M. Characterization of chikungunya virus  
683 induced host response in a mouse model of viral myositis. *PloS one*. 2014;9(3):e92813.
- 684 43. Thio CL, Yusof R, Abdul-Rahman PS, Karsani SA. Differential proteome analysis of chikungunya  
685 virus infection on host cells. *PloS one*. 2013;8(4):e61444.
- 686 44. Sreekanth GP, Chuncharunee A, Sirimontaporn A, Panaampon J, Noisakran S, Yenchitsomanus  
687 PT, et al. SB203580 Modulates p38 MAPK Signaling and Dengue Virus-Induced Liver Injury by Reducing  
688 MAPKAPK2, HSP27, and ATF2 Phosphorylation. *PloS one*. 2016;11(2):e0149486.
- 689 45. Ehling C, Trilling M, Tiedje C, Le-Trilling VTK, Albrecht U, Kluge S, et al. MAPKAP kinase 2  
690 regulates IL-10 expression and prevents formation of intrahepatic myeloid cell aggregates during  
691 cytomegalovirus infections. *Journal of hepatology*. 2016;64(2):380-9.

- 692 46. Corcoran JA, Johnston BP, McCormick C. Viral activation of MK2-hsp27-p115RhoGEF-RhoA  
693 signaling axis causes cytoskeletal rearrangements, p-body disruption and ARE-mRNA stabilization. *PLoS*  
694 *pathogens*. 2015;11(1):e1004597.
- 695 47. Luig C, Kother K, Dudek SE, Gaestel M, Hiscott J, Wixler V, et al. MAP kinase-activated protein  
696 kinases 2 and 3 are required for influenza A virus propagation and act via inhibition of PKR. *FASEB*  
697 *journal : official publication of the Federation of American Societies for Experimental Biology*.  
698 2010;24(10):4068-77.
- 699 48. Wiredja DD, Tabler CO, Schlatzer DM, Li M, Chance MR, Tilton JC. Global phosphoproteomics of  
700 CCR5-tropic HIV-1 signaling reveals reprogramming of cellular protein production pathways and  
701 identifies p70-S6K1 and MK2 as HIV-responsive kinases required for optimal infection of CD4+ T cells.  
702 *Retrovirology*. 2018;15(1):44.
- 703 49. Rainey-Barger EK, Rumble JM, Lalor SJ, Esen N, Segal BM, Irani DN. The lymphoid chemokine,  
704 CXCL13, is dispensable for the initial recruitment of B cells to the acutely inflamed central nervous  
705 system. *Brain, behavior, and immunity*. 2011;25(5):922-31.
- 706 50. Mosquera JA. [Role of the receptor for advanced glycation end products (RAGE) in  
707 inflammation]. *Investigacion clinica*. 2010;51(2):257-68.
- 708 51. Means JC, Passarelli AL. Viral fibroblast growth factor, matrix metalloproteases, and caspases  
709 are associated with enhancing systemic infection by baculoviruses. *Proceedings of the National*  
710 *Academy of Sciences of the United States of America*. 2010;107(21):9825-30.
- 711 52. Roques P, Gras G. Chikungunya fever: focus on peripheral markers of pathogenesis. *The Journal*  
712 *of infectious diseases*. 2011;203(2):141-3.

713

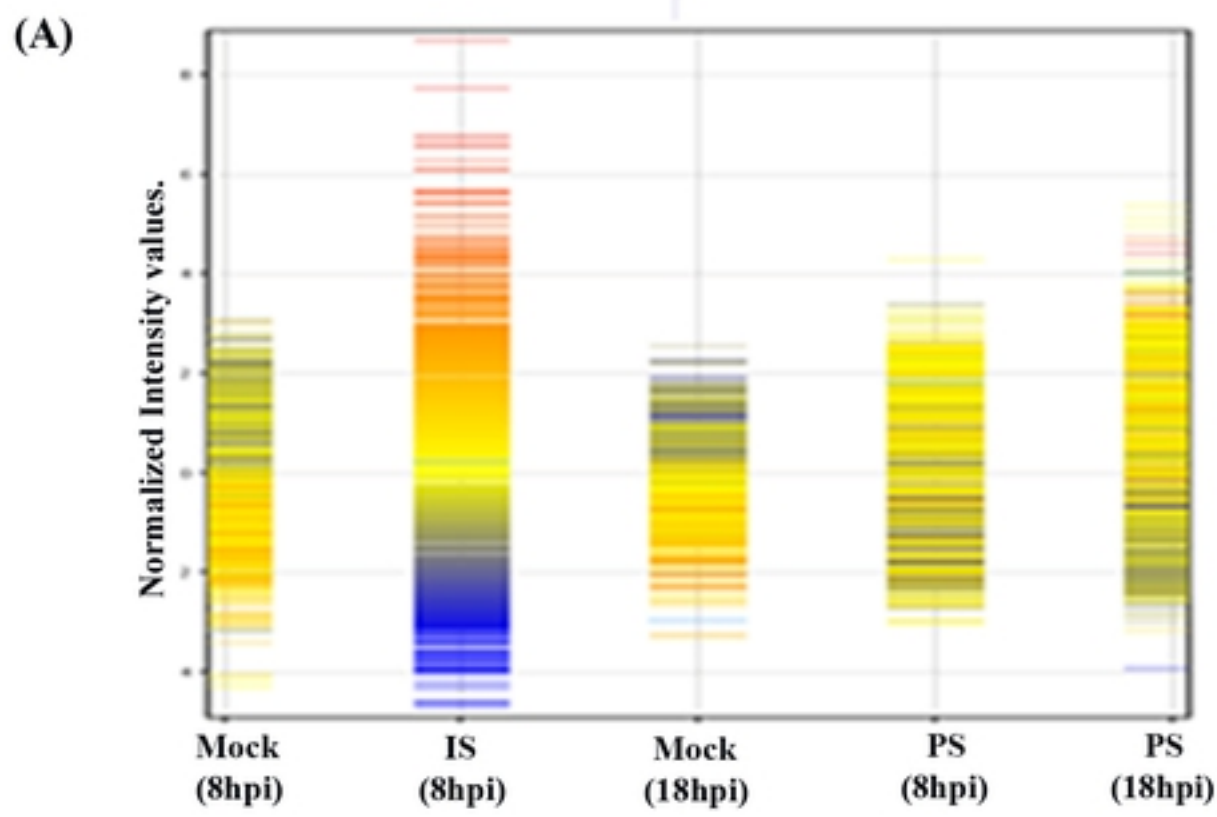

bioRxiv preprint doi: <https://doi.org/10.1101/2021.05.26.445768>; this version posted May 26, 2021. The copyright holder for this preprint (which was not certified by peer review) is the author/funder, who has granted bioRxiv a license to display the preprint in perpetuity. It is made available under aCC-BY 4.0 International license.

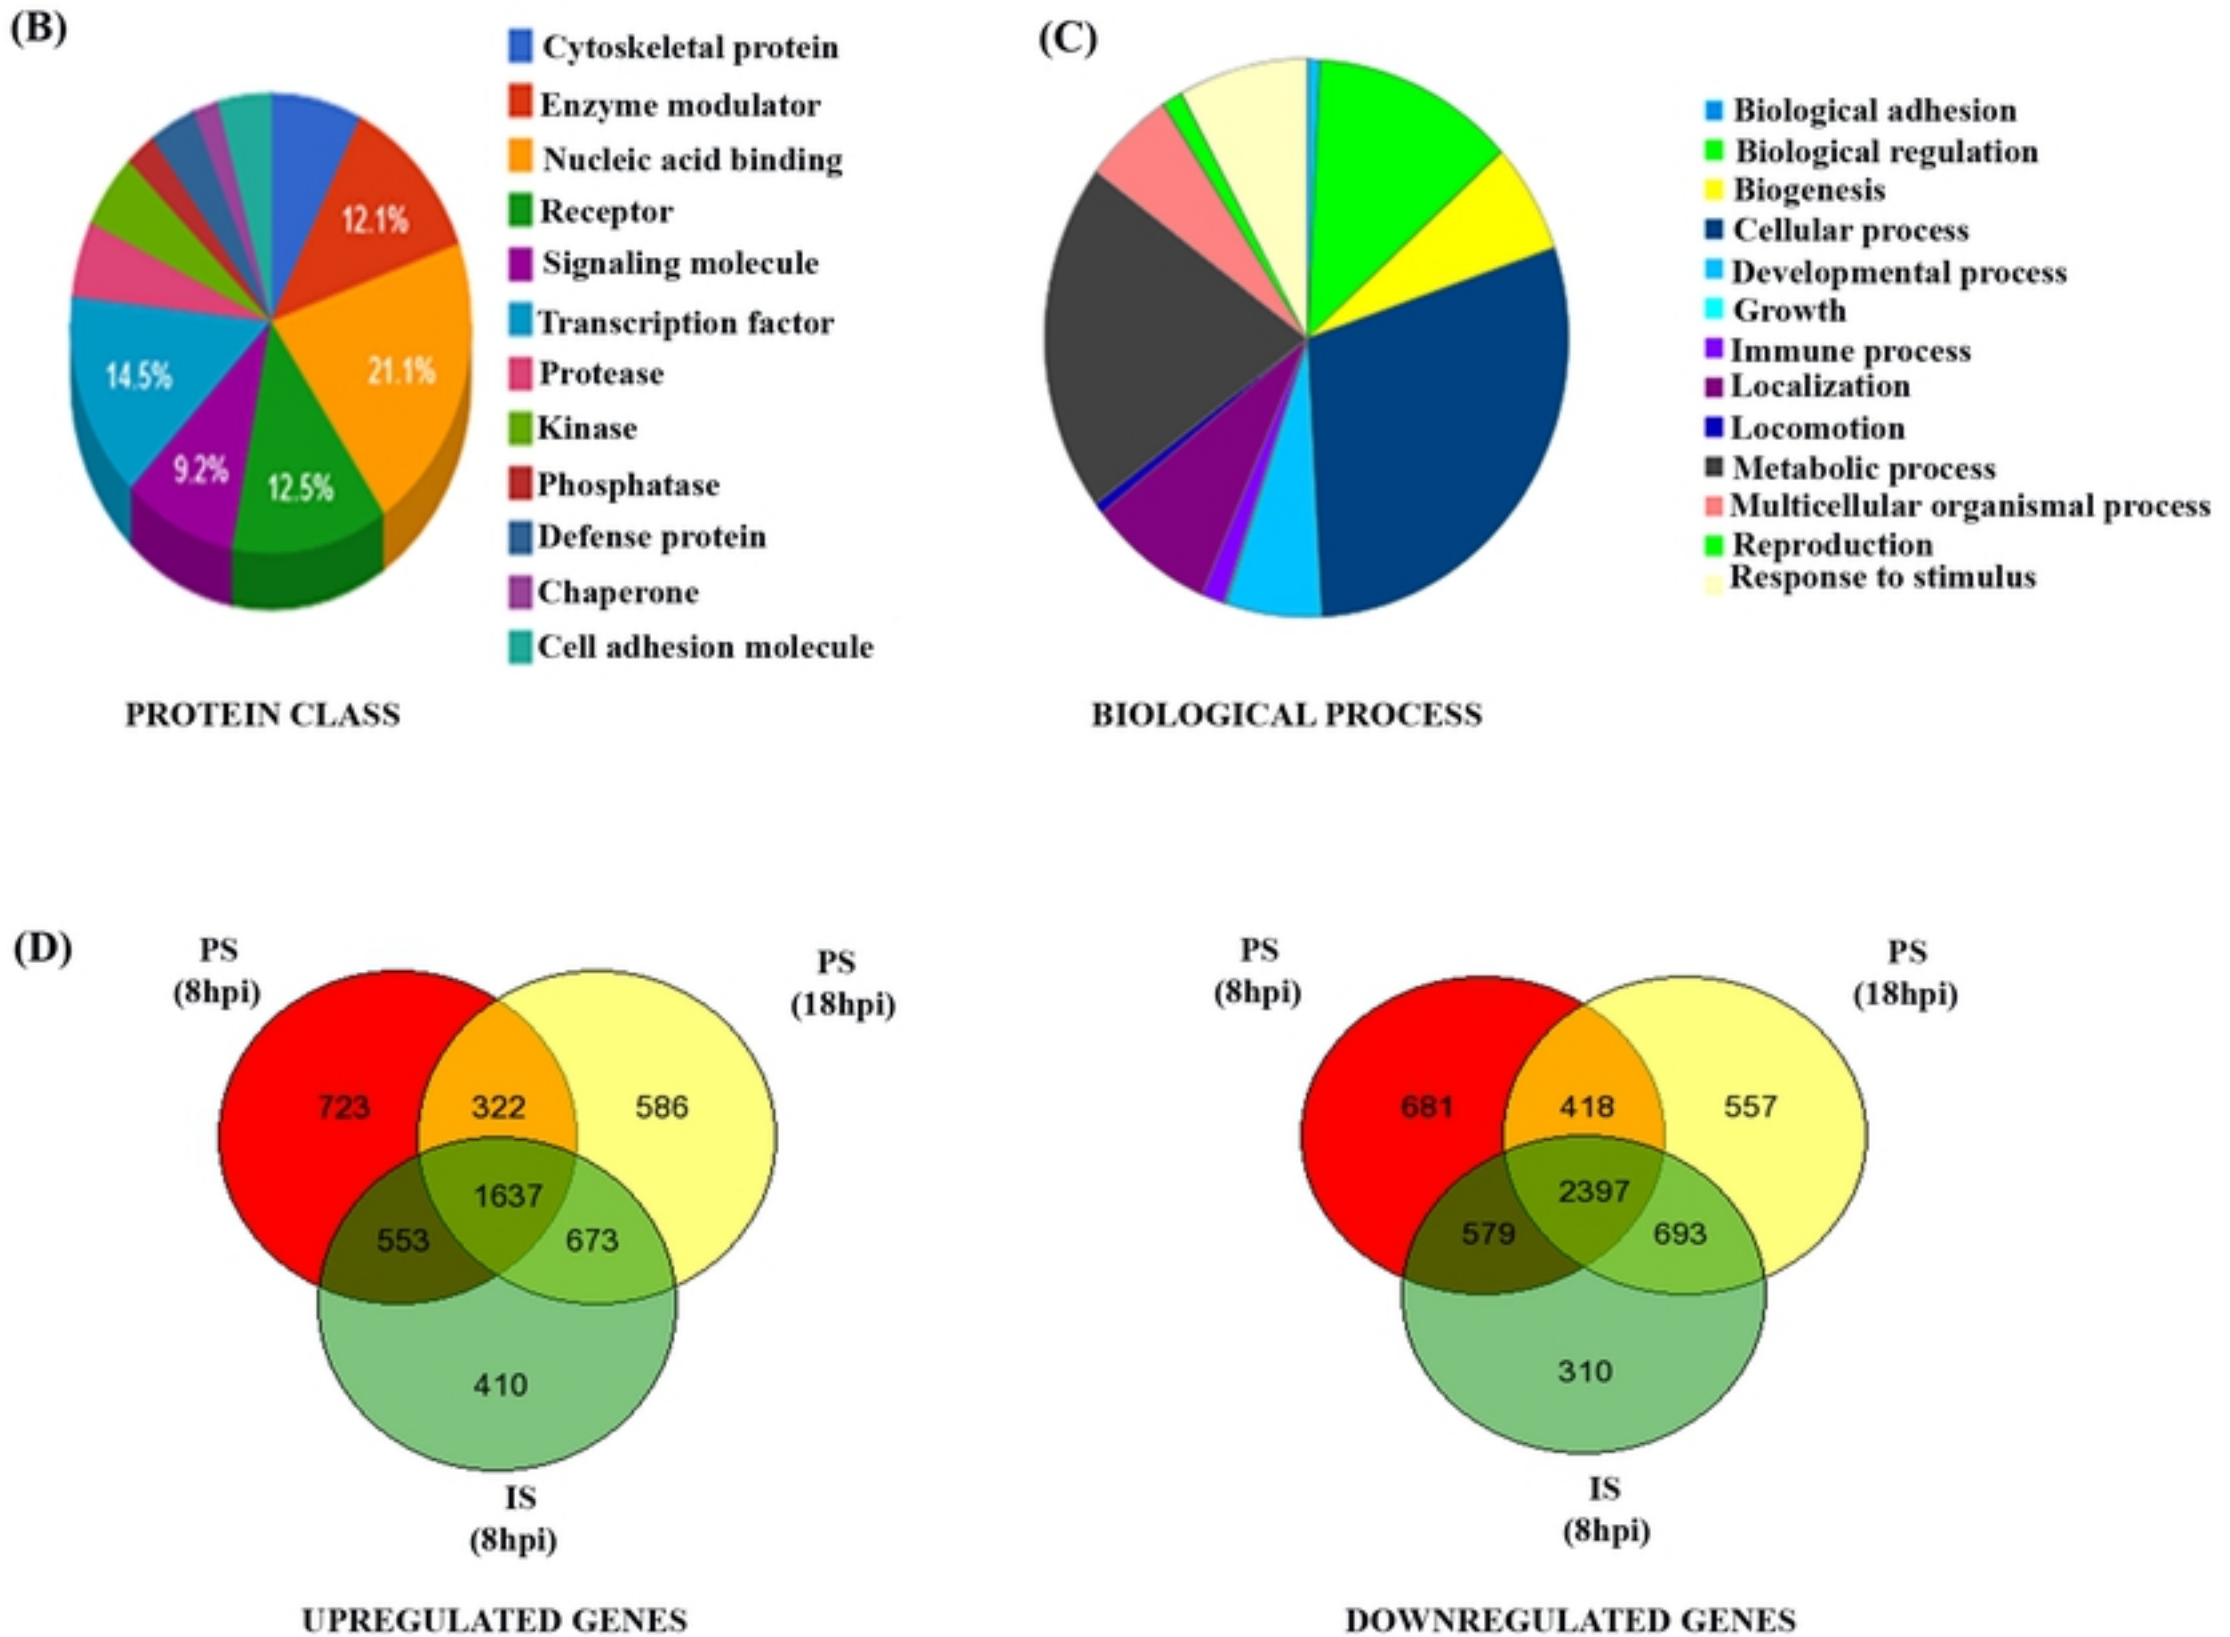

Fig 1

Figure 1

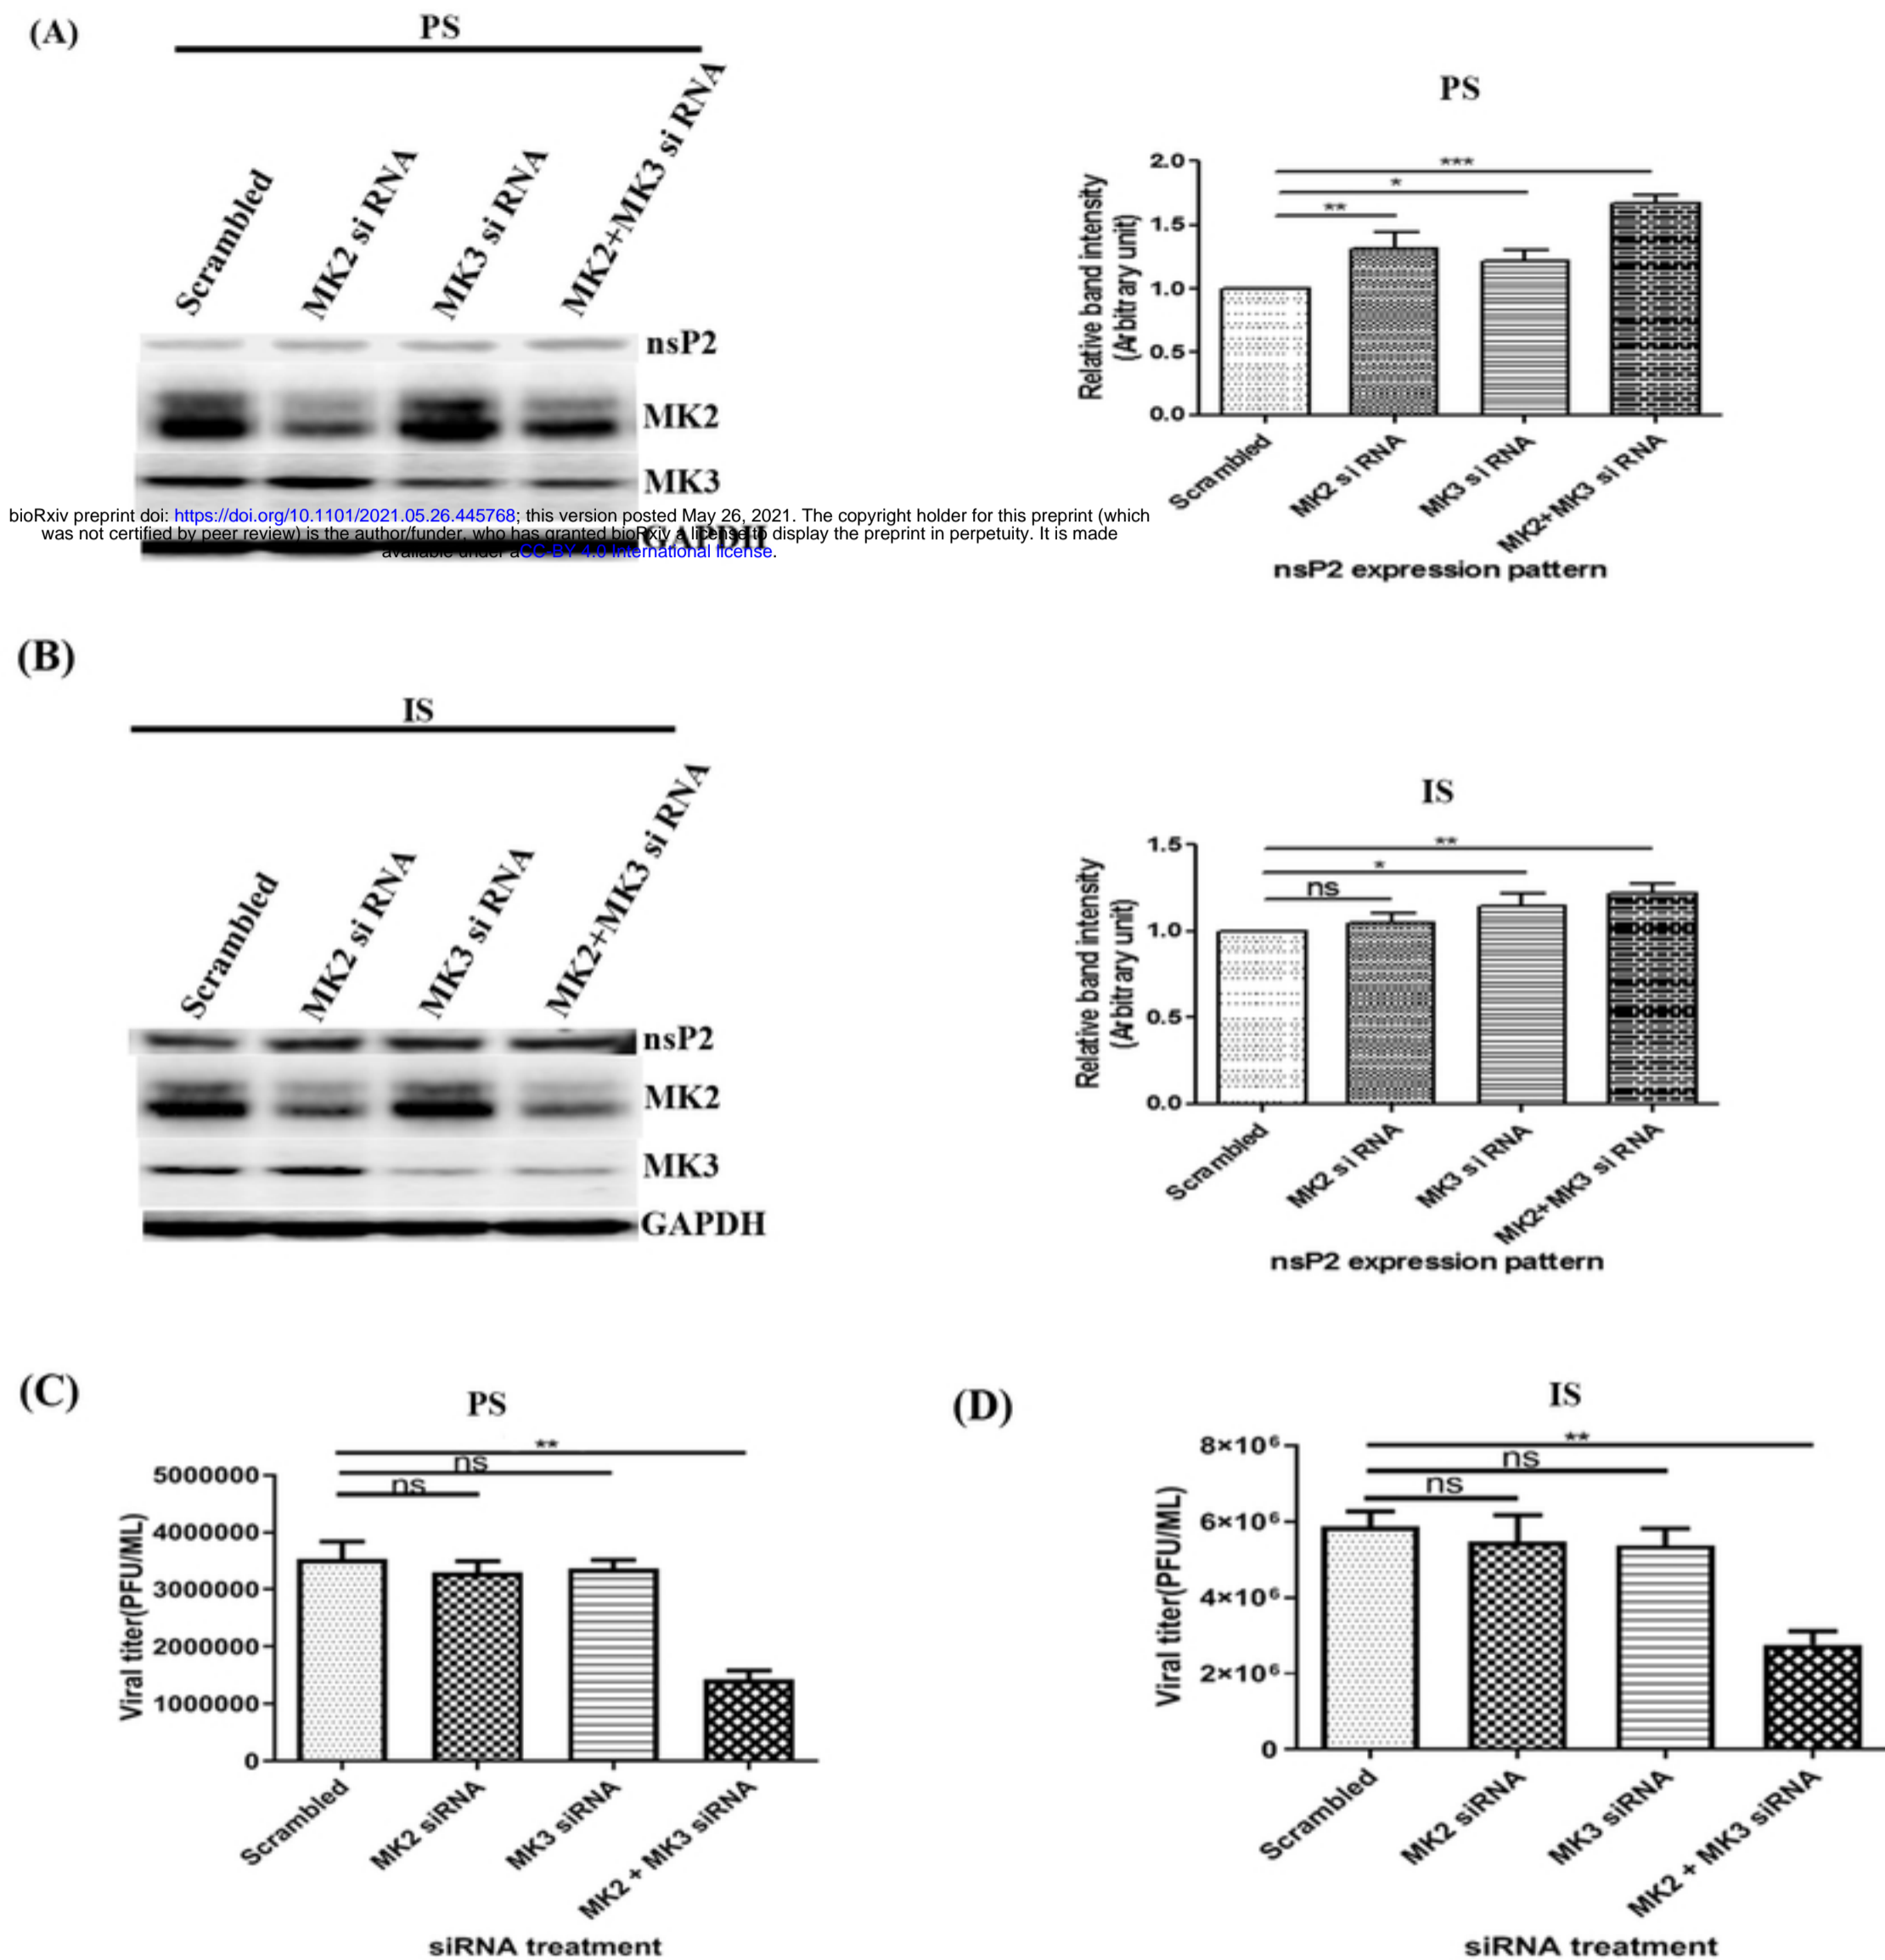

**Fig 2**

(A)

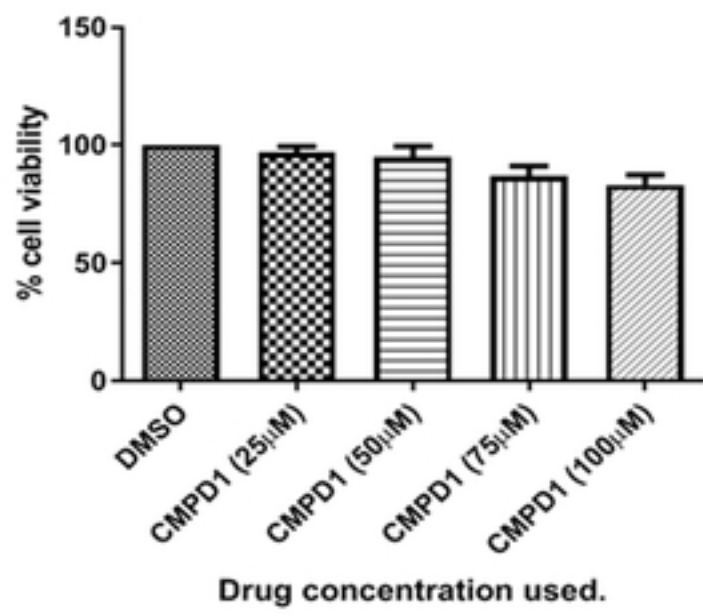

(B)

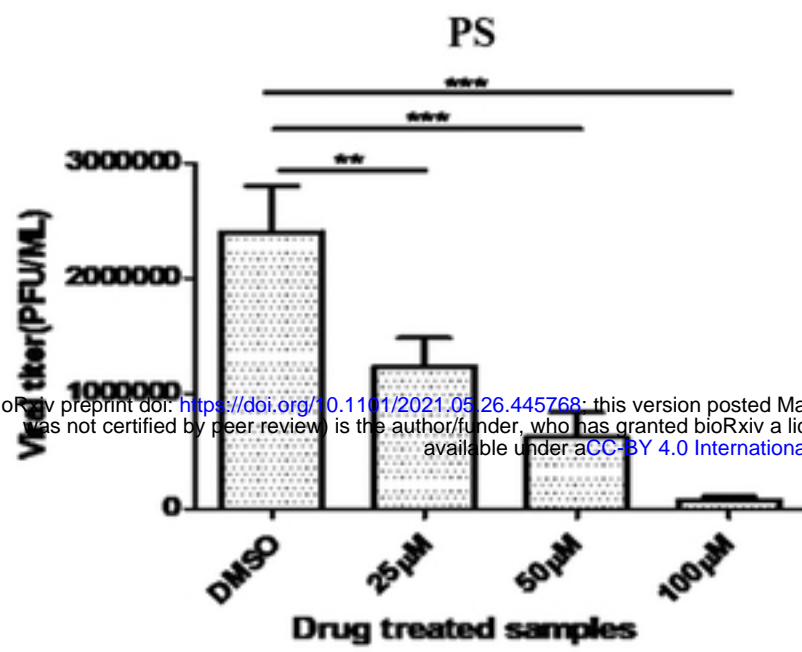

(C)

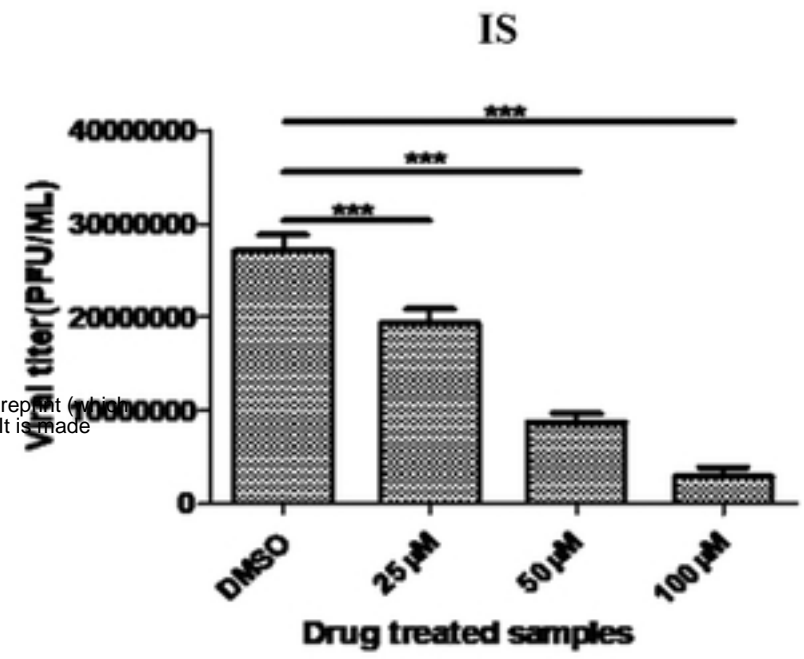

bioRxiv preprint doi: <https://doi.org/10.1101/2021.05.26.445768>; this version posted May 26, 2021. The copyright holder for this preprint (which was not certified by peer review) is the author/funder, who has granted bioRxiv a license to display the preprint in perpetuity. It is made available under aCC-BY 4.0 International license.

(D)

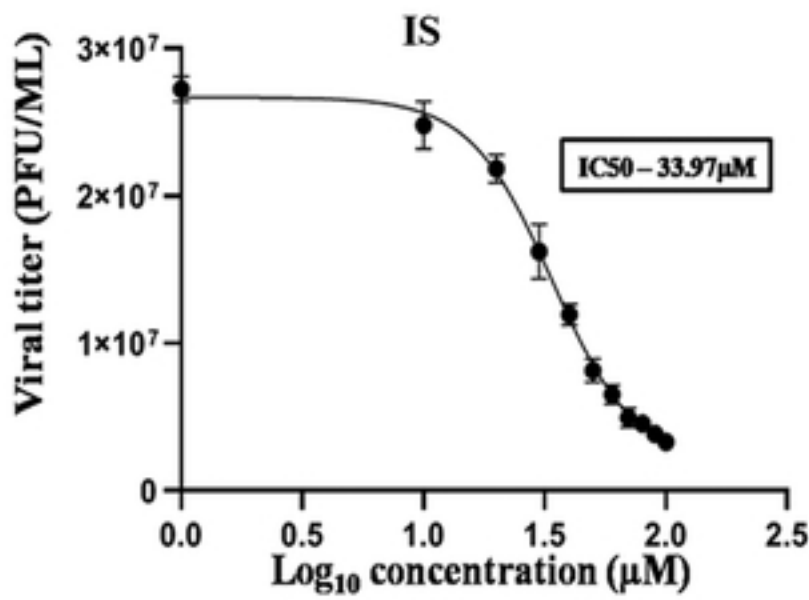

(E)

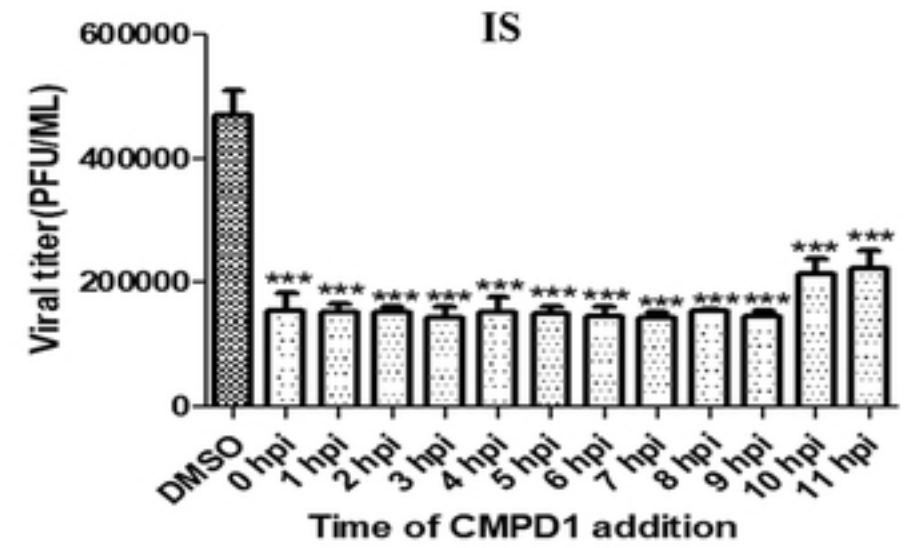

(F)

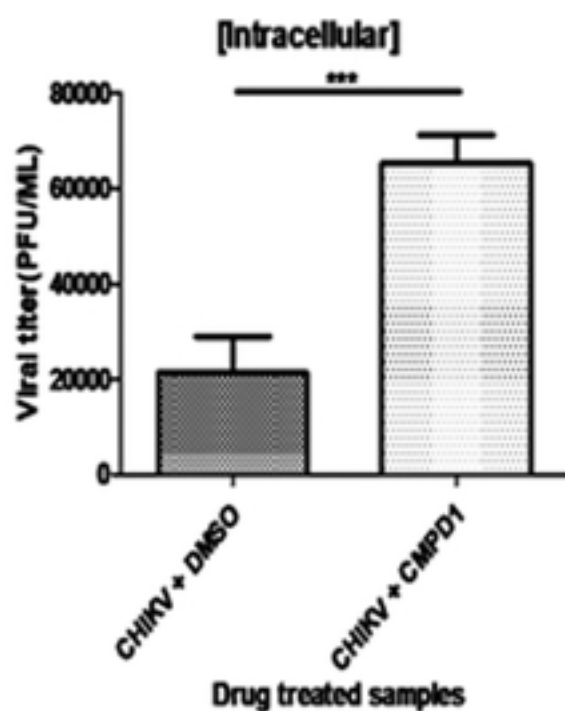

(G)

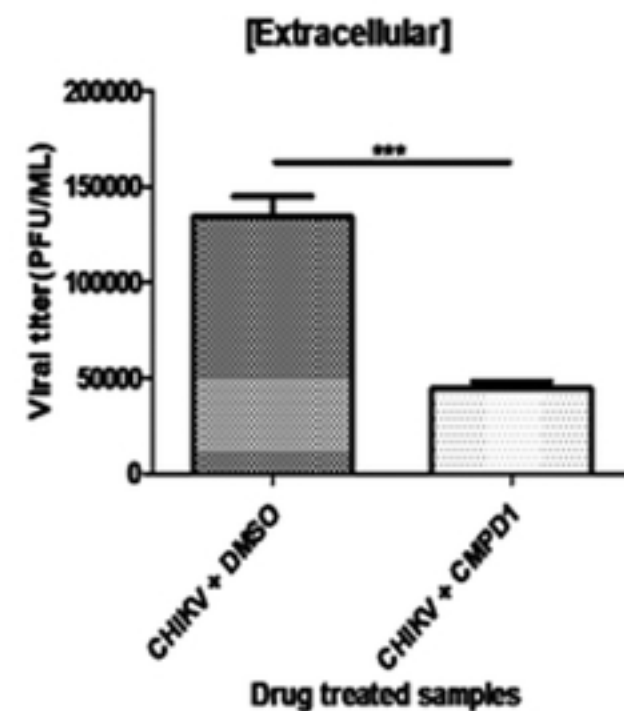

Fig 3

Figure 3



**(A)**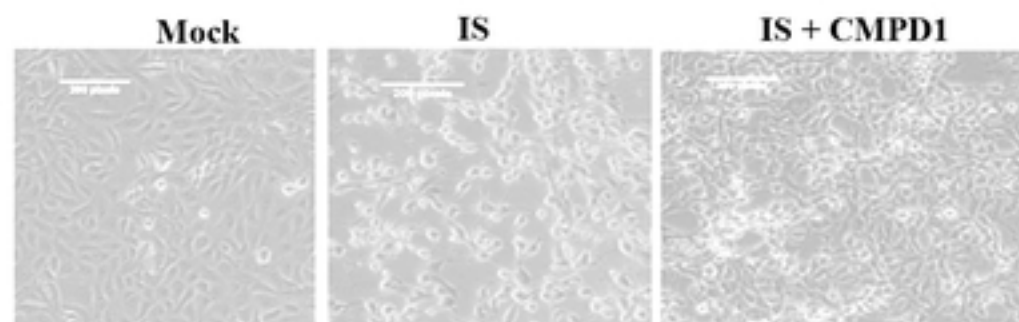**(B)**

bioRxiv preprint doi: <https://doi.org/10.1101/2021.05.26.445768>; this version posted May 26, 2021. The copyright holder for this preprint (which was not certified by peer review) is the author/funder, who has granted bioRxiv a license to display the preprint in perpetuity. It is made available under aCC-BY 4.0 International license.

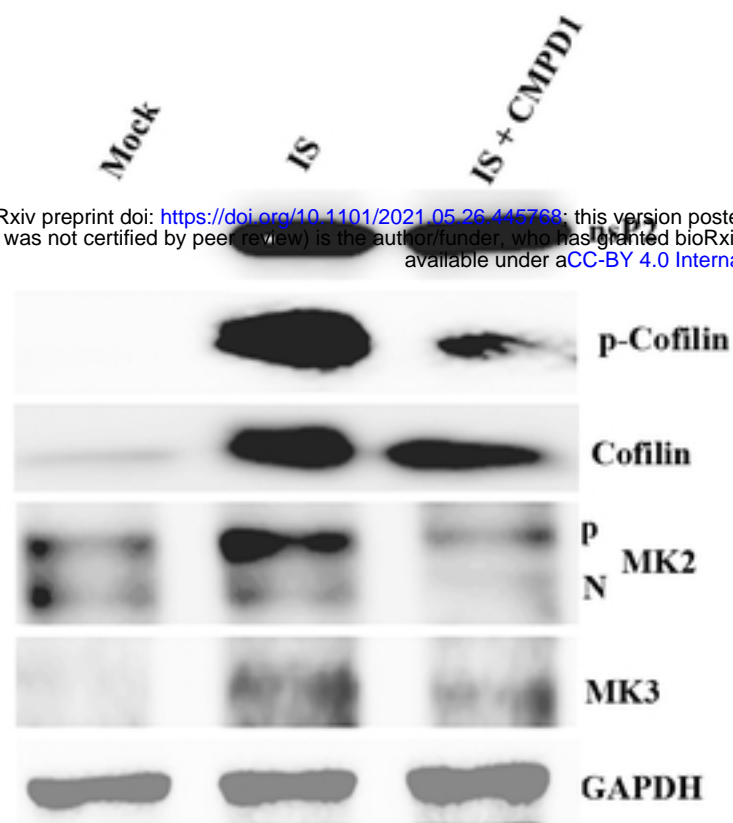**(C)**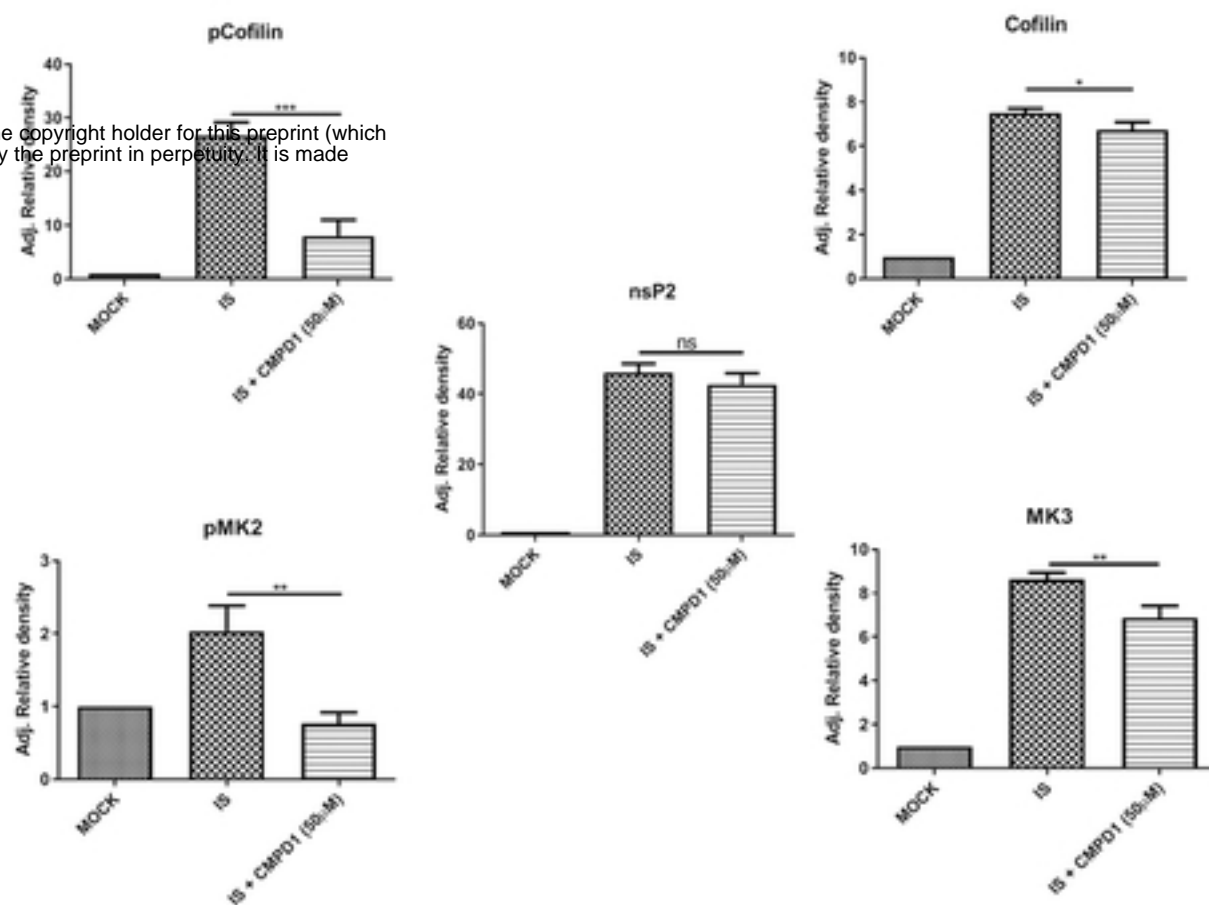**(D)**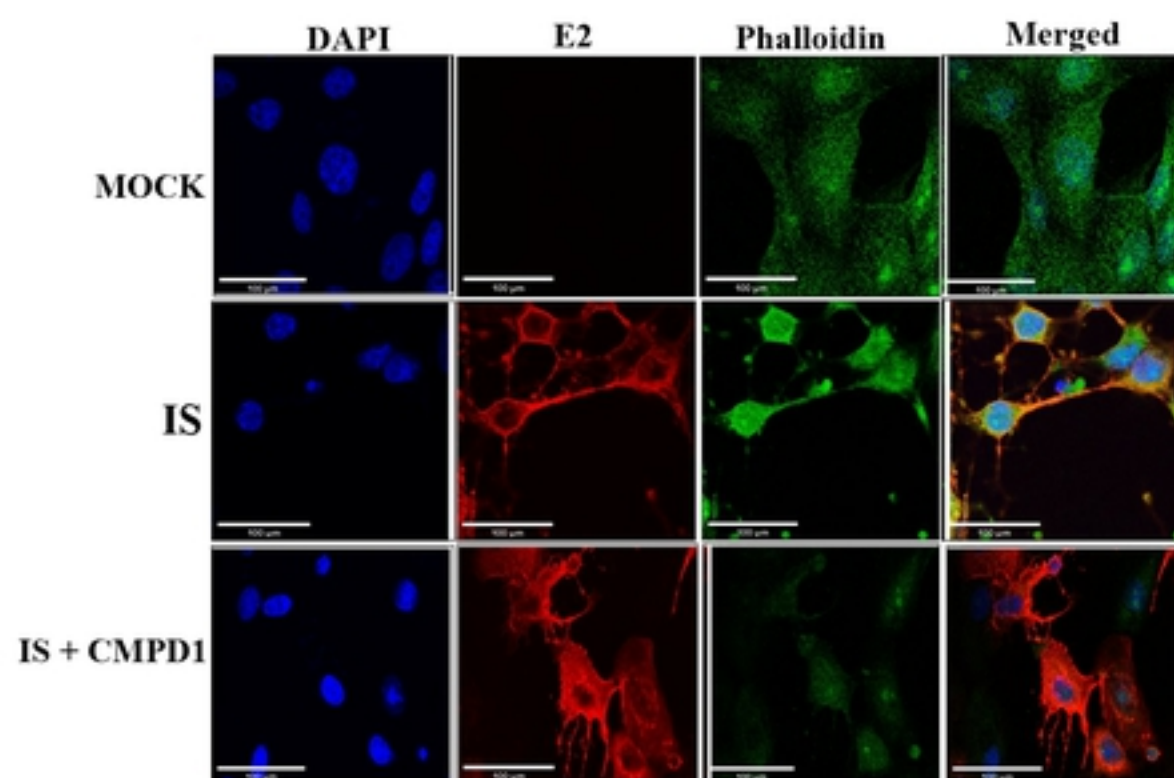

**Fig 4**

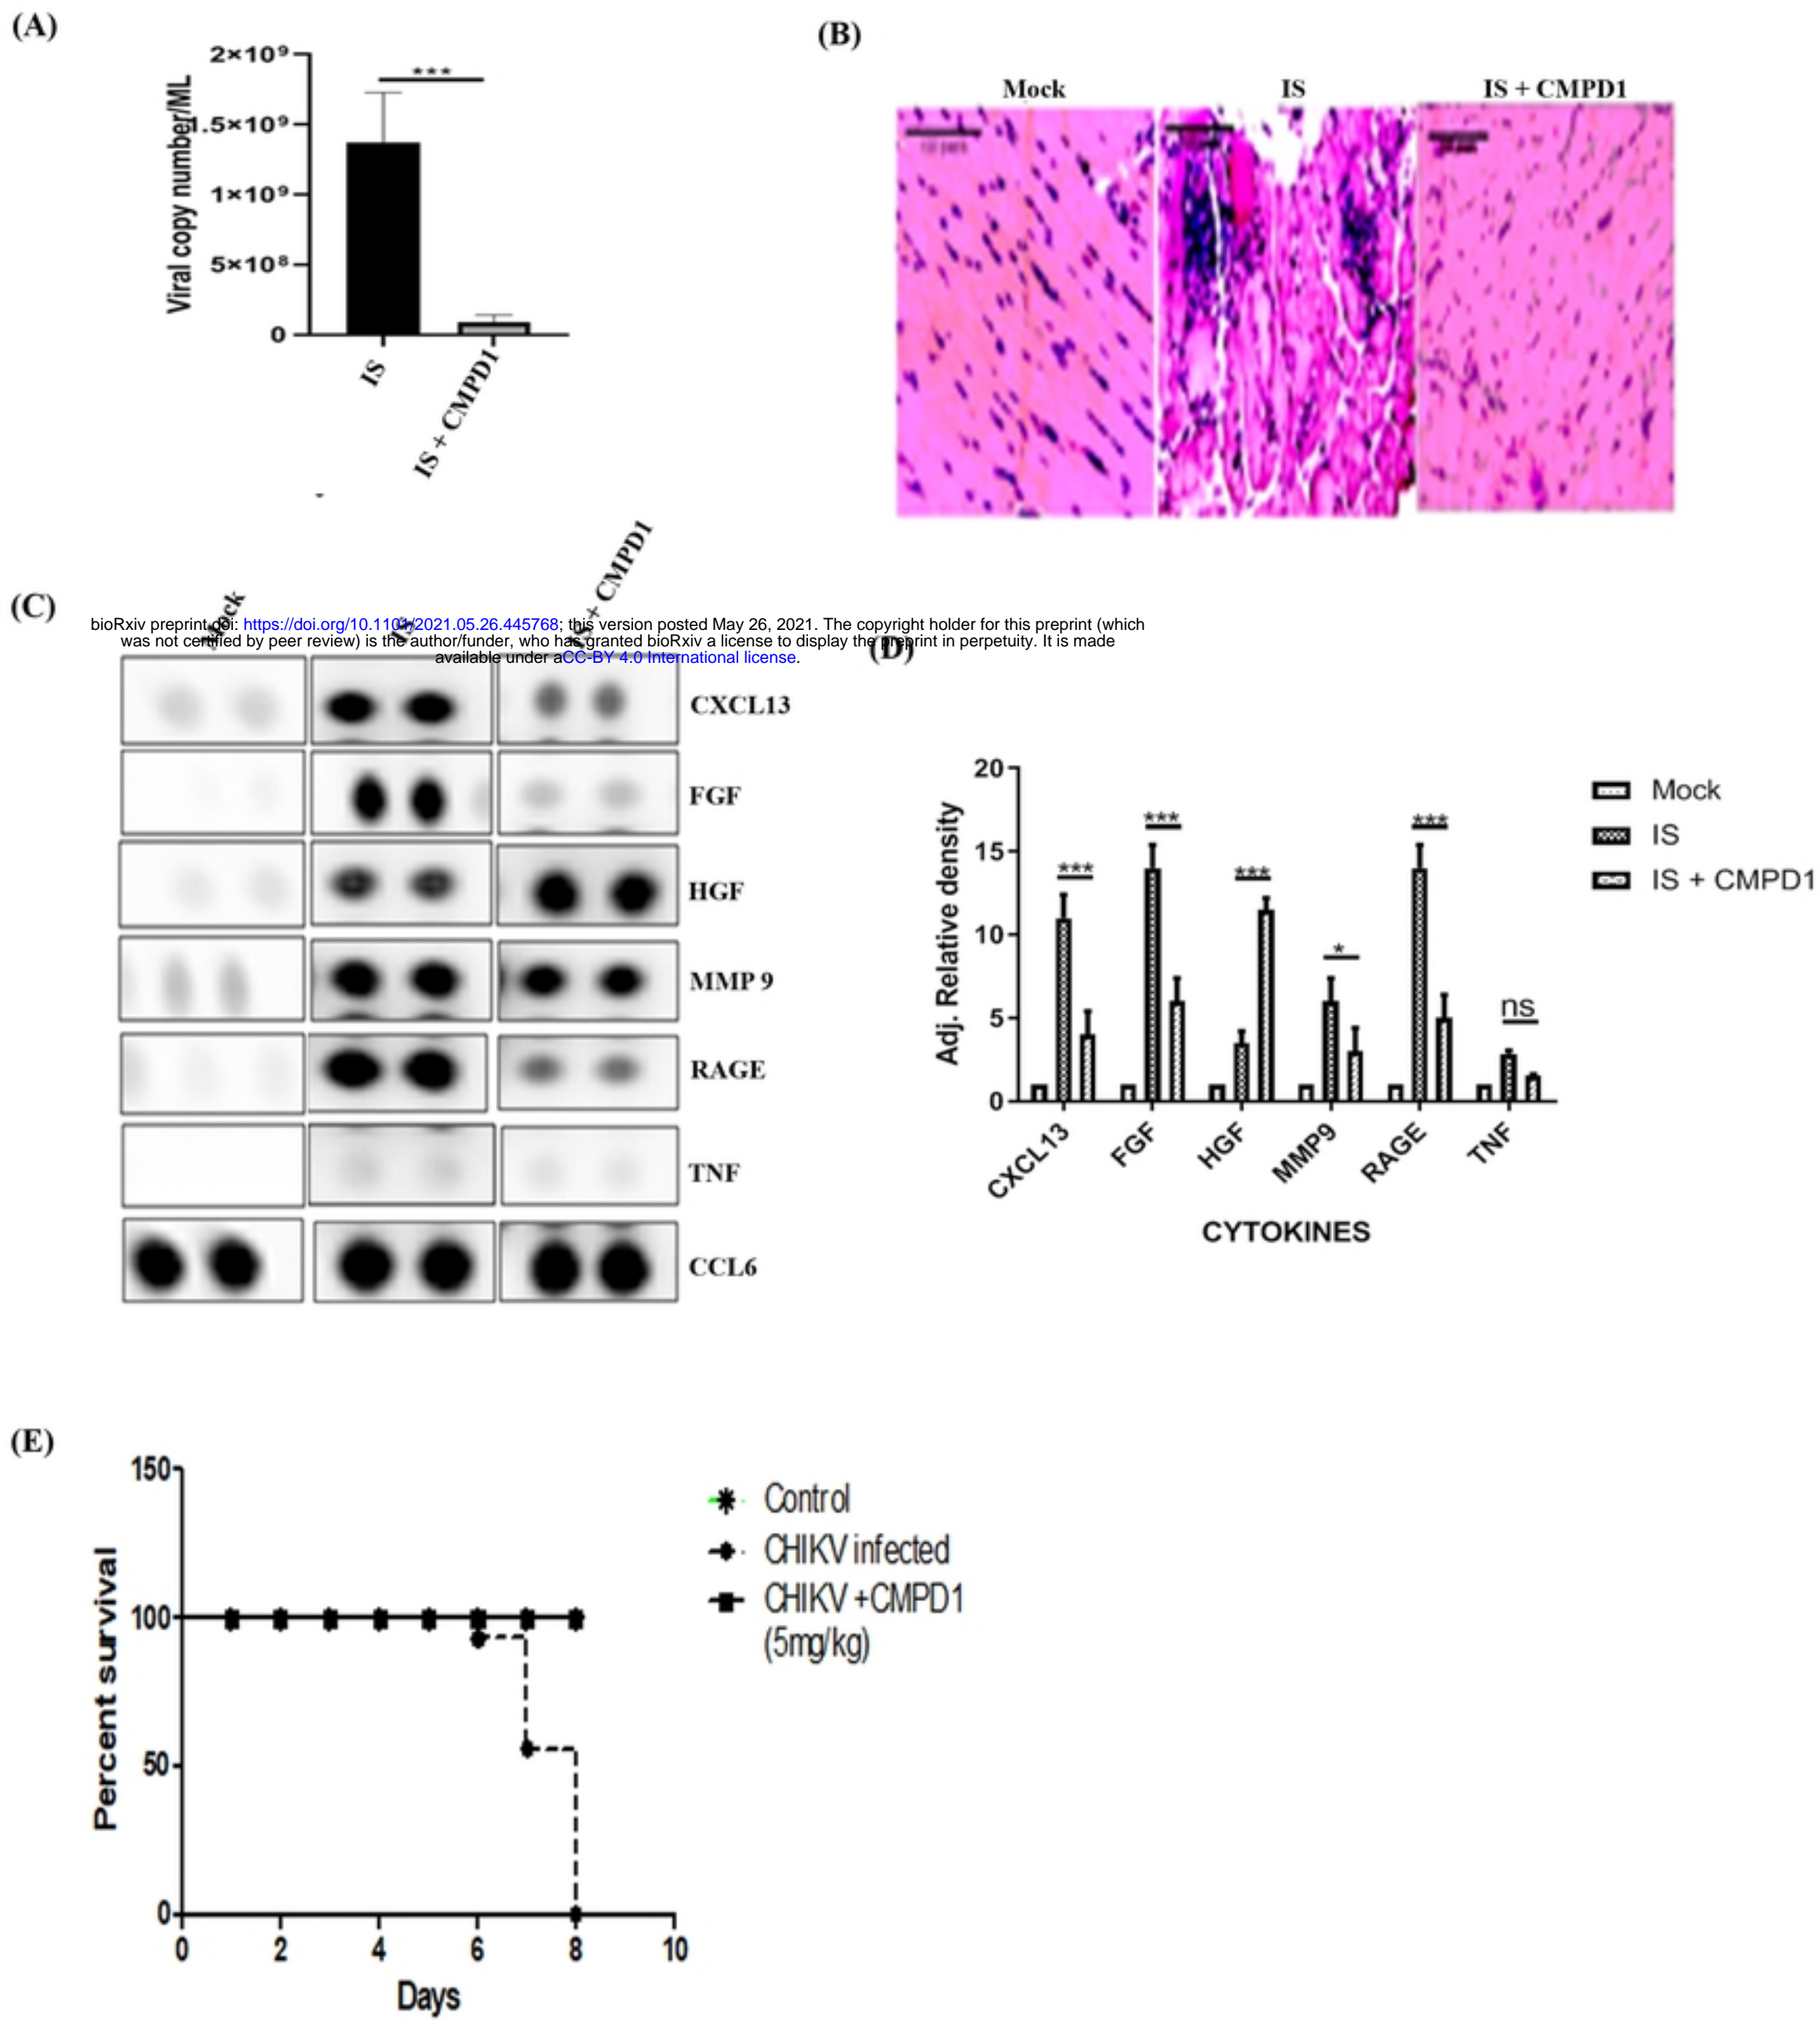

Fig 5

Figure 5

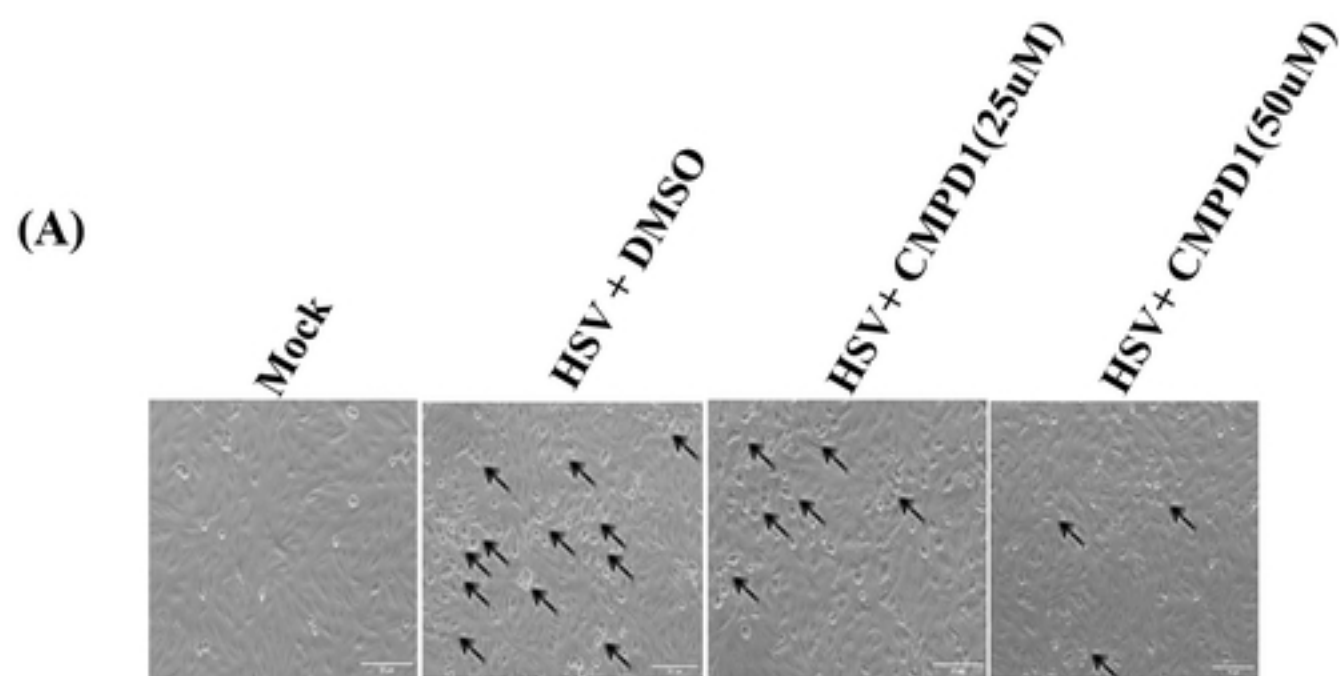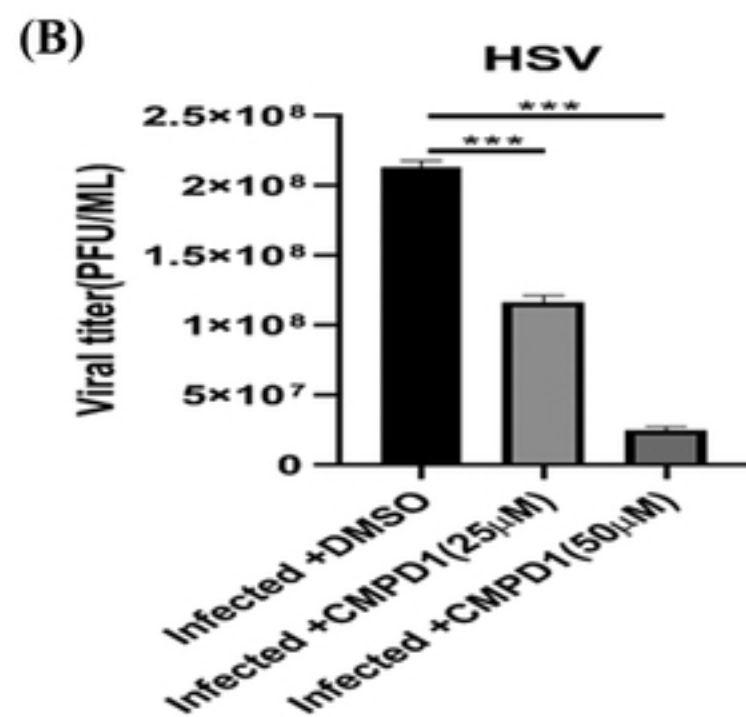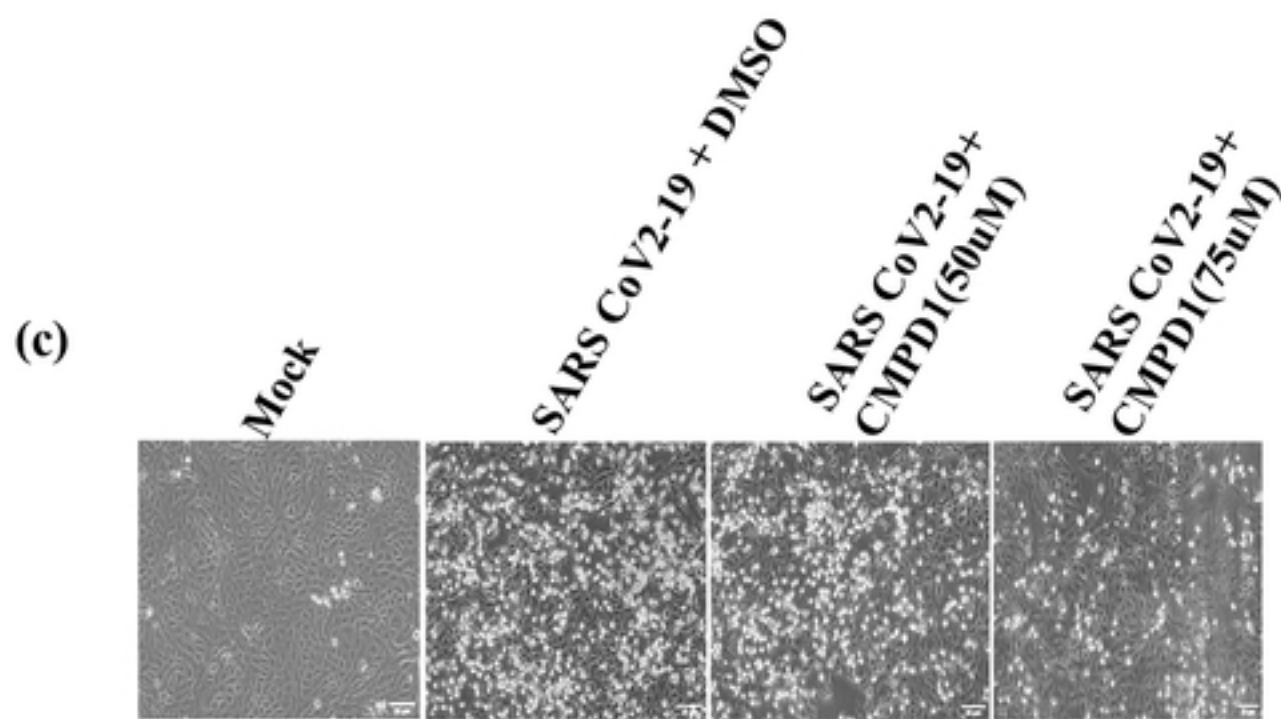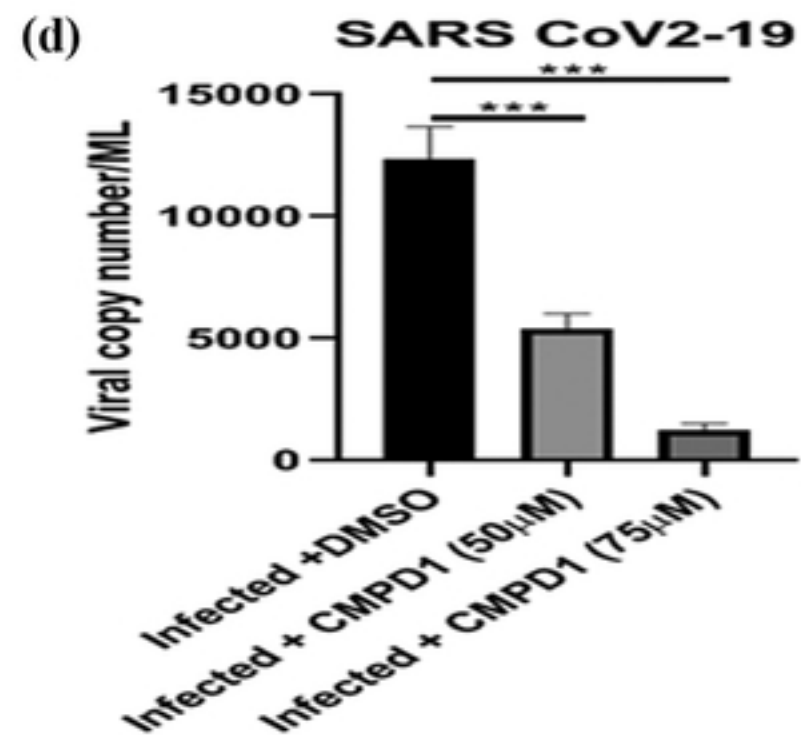

Figure 6

(A)

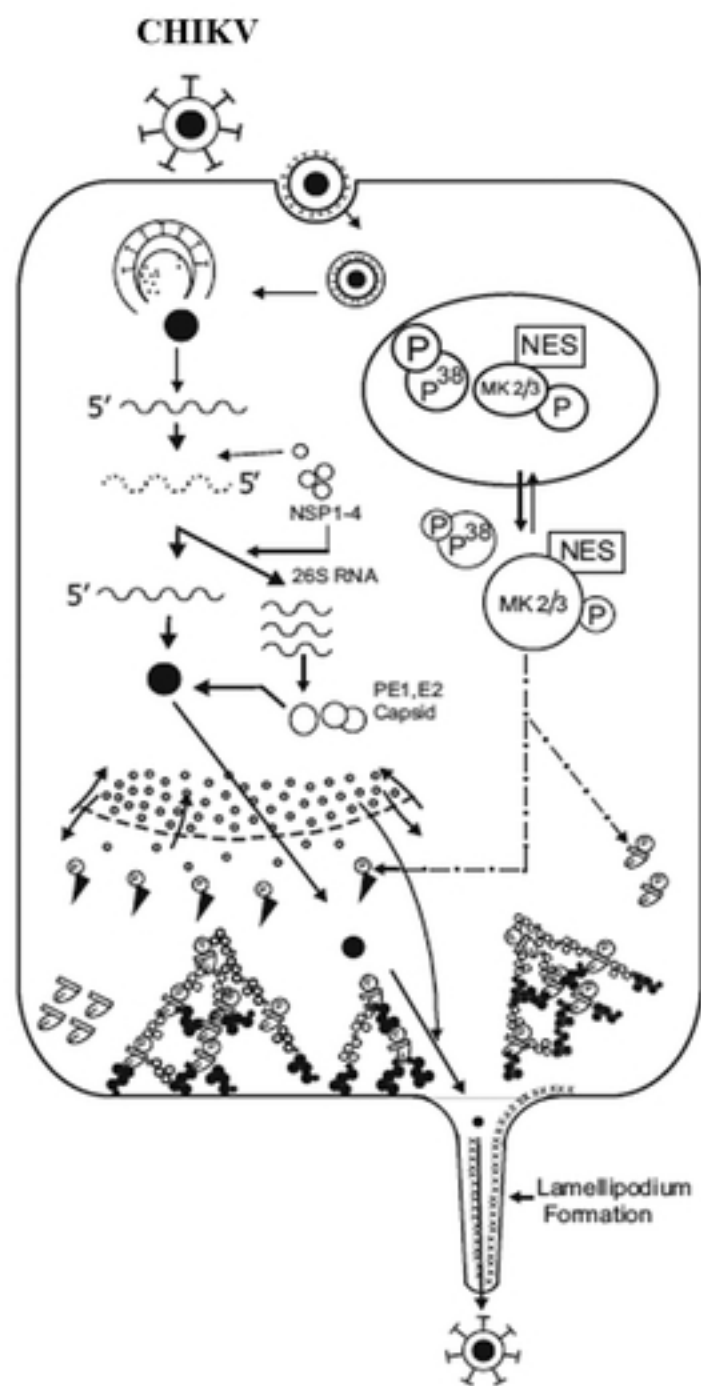

(B)

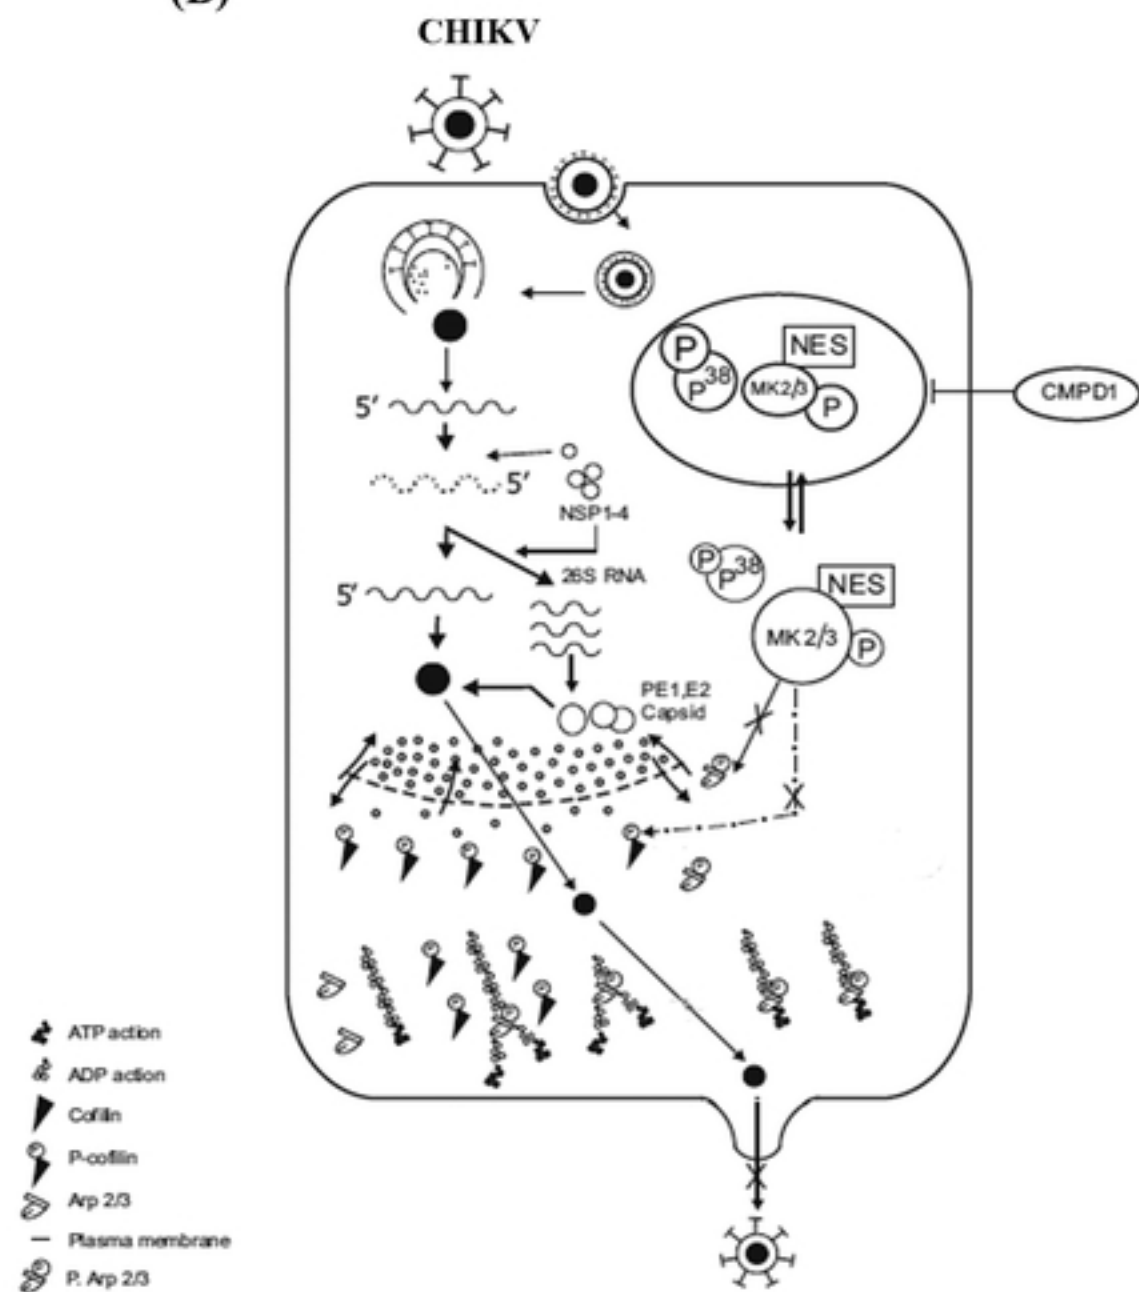

Fig 7

Figure 7
